# Supplementary material for: Hospital-based cohort study to determine the association between home-time and disability after stroke by age, sex, stroke type and study year in Canada
Source: PubMed Central journal article supplement — BMJ Open. 2019 Nov 11;9(11):e031379. doi: 10.1136/bmjopen-2019-031379 (PMC6858198; doi:10.1136/bmjopen-2019-031379), 2019-11-11
Supplement: bmjopen-2019-031379.draft_revisions.pdf [file bmjopen-2019-031379.draft_revisions.pdf]

# BMJ Open

BMJ Open is committed to open peer review. As part of this commitment we make the peer review history of every article we publish publicly available.

When an article is published we post the peer reviewers' comments and the authors' responses online. We also post the versions of the paper that were used during peer review. These are the versions that the peer review comments apply to.

The versions of the paper that follow are the versions that were submitted during the peer review process. They are not the versions of record or the final published versions. They should not be cited or distributed as the published version of this manuscript.

BMJ Open is an open access journal and the full, final, typeset and author-corrected version of record of the manuscript is available on our site with no access controls, subscription charges or pay-per-view fees (<http://bmjopen.bmj.com>).

If you have any questions on BMJ Open's open peer review process please email [info.bmjopen@bmj.com](mailto:info.bmjopen@bmj.com)

# BMJ Open

## Population-based cohort study to determine the association between home-time and disability after stroke by age, sex, stroke type, and study year

|                               |                                                                                                                                                                                                                                                                                                                                                                                 |
|-------------------------------|---------------------------------------------------------------------------------------------------------------------------------------------------------------------------------------------------------------------------------------------------------------------------------------------------------------------------------------------------------------------------------|
| Journal:                      | <i>BMJ Open</i>                                                                                                                                                                                                                                                                                                                                                                 |
| Manuscript ID                 | bmjopen-2019-031379                                                                                                                                                                                                                                                                                                                                                             |
| Article Type:                 | Research                                                                                                                                                                                                                                                                                                                                                                        |
| Date Submitted by the Author: | 01-May-2019                                                                                                                                                                                                                                                                                                                                                                     |
| Complete List of Authors:     | Yu, Amy Ying Xin; University of Toronto, Medicine (Neurology)<br>Fang, Jiming; Institute for Clinical Evaluative Sciences<br>Porter, Joan; Institute for Clinical Evaluative Sciences<br>Austin, Peter; Institute for Clinical Evaluative Sciences<br>Smith, Eric E.; University of Calgary, Hotchkiss Brain Institute<br>Kapral, MK; University of Toronto Faculty of Medicine |
| Keywords:                     | Stroke < NEUROLOGY, Organisation of health services < HEALTH SERVICES ADMINISTRATION & MANAGEMENT, Public health < INFECTIOUS DISEASES, EPIDEMIOLOGY                                                                                                                                                                                                                            |
|                               |                                                                                                                                                                                                                                                                                                                                                                                 |

SCHOLARONE™  
Manuscripts

Confidential – Yu, AYX

1  
2  
3 Title: Population-based cohort study to determine the association between home-time and  
4 disability after stroke by age, sex, stroke type, and study year  
5  
6  
7  
8  
9

10 Authors: Amy Y X Yu MD MSc<sup>1,2</sup>, Jiming Fang PhD<sup>2</sup>, Joan Porter MSc<sup>2</sup>, Peter C Austin PhD<sup>2</sup>,  
11 Eric E Smith MD MPH<sup>3</sup>, Moira K Kapral MD MSc<sup>2,4</sup>  
12  
13  
14  
15  
16

17 <sup>1</sup>Department of Medicine (Neurology), University of Toronto, Sunnybrook Health Sciences  
18 Centre, Toronto, Ontario, Canada, <sup>2</sup>ICES, Toronto, Ontario, Canada, <sup>3</sup>Department of Clinical  
19 Neurosciences and Hotchkiss Brain Institute, University of Calgary, Calgary, Alberta, Canada,  
20  
21 <sup>4</sup>Department of Medicine (General Internal Medicine), University of Toronto-University Health  
22 Network, Toronto, Ontario, Canada.  
23  
24  
25  
26  
27  
28  
29  
30

31 **Correspondence to:** Dr. Amy Y. X. Yu, MD, FRCPC, Neurologist, Department of Medicine  
32 (Neurology), University of Toronto, Sunnybrook Health Sciences Centre, Office A-442, 2075  
33 Bayview Avenue, CANADA Phone: 1 (416) 480-4866, Fax: 1 (416) 480-5753,  
34  
35 [amyx.yu@utoronto.ca](mailto:amyx.yu@utoronto.ca) Twitter handle: @YuAmyyu  
36  
37  
38  
39  
40  
41  
42  
43  
44  
45  
46  
47  
48  
49  
50  
51  
52  
53  
54  
55  
56  
57  
58  
59  
60

**Abstract word count:** 285 words

**Article word count:** 2,529 words

**References:** 27 references

**Tables:** 2

**Figures:** 3

Confidential – Yu, AYX

## Abstract

**Objective:** Home-time is an emerging patient-centered stroke outcome metric, but it is not well described in the population. We aimed to determine the association between 90-day home-time and global disability after stroke. We hypothesized that longer home-time would be associated with less disability.

**Design:** Population-based cohort study of patients with ischemic stroke or intracerebral hemorrhage admitted to an acute care hospital between April 1st 2002 and March 31st 2013.

**Setting:** All regional stroke centres and a simple random sample of patients from all other hospitals across the province of Ontario, Canada.

**Participants:** We included 39,417 adult patients (84% ischemic, 16% hemorrhage), 53% male, with a median age of 74 years. We excluded non-residents of Ontario, patients without a valid health insurance number, patients discharged against medical advice or those who failed to return from a pass, patients living in a long-term care centre at baseline, and stroke events occurring in-hospital.

**Primary outcome measure:** 90-day home-time, defined as the number of days spent at home in the first 90 days after stroke, obtained using linked administrative data.

**Results:** Compared to people with no disability, those with minimal disability had less home-time (adjusted rate ratio (aRR) 0.96, 95% confidence intervals (CI<sub>95</sub>) [0.93,0.98]) and those with the most severe disability had the least home-time (aRR 0.05 CI<sub>95</sub> [0.04,0.05]). We found no clinically relevant modification by stroke type, sex, or study year. However, for a given level of disability, older patients experienced less home-time compared to younger patients.

Confidential – Yu, AYX

1  
2  
3 **Conclusions:** Our results provide content validity for home-time to be used to monitor stroke  
4  
5 outcomes in large populations or to study temporal trends. Older patients experience less home-  
6  
7 time for a given level of disability, suggesting the need for stratification by age.  
8  
9

### 10 11 12 **Strengths and limitations of this study**

- 14 • Population-based analysis of home-time, a graded stroke outcome metric that can be  
15 derived from administrative data.
- 16  
17 • First study to assess the association between home-time and global disability in  
18 subgroups, including stroke type, sex, age groups, and study year.
- 19  
20 • Lack of data on disability after hospital discharge.
- 21  
22 • Lack of data on social support or private funds, which may influence ability to return  
23 home.  
24  
25  
26  
27  
28  
29  
30  
31  
32  
33  
34  
35  
36  
37  
38  
39  
40  
41  
42  
43  
44  
45  
46  
47  
48  
49  
50  
51  
52  
53  
54  
55  
56  
57  
58  
59  
60

Confidential – Yu, AYX

## Introduction

Stroke is a leading cause of severe disability.<sup>1 2</sup> The lack of a routinely collected graded stroke outcome metric is a critical limitation to population-based stroke outcome research. The modified Rankin Scale (mRS) is the most frequently used measure of functional outcome in stroke clinical research, but it cannot be routinely obtained for all patients as it requires prospective patient follow-up and testing.<sup>3</sup> Home-time is a novel stroke outcome indicator that is correlated with the mRS when assessed in clinical trial populations with ischemic stroke.<sup>4-6</sup> Home-time is defined as the total number of days a patient is living outside of a healthcare institution after stroke. This metric is patient-centered<sup>7 8</sup> and is ideal for pragmatic studies evaluating real-world outcomes because it can be derived for large populations using administrative data.<sup>5 6</sup>

There are nevertheless several gaps in knowledge about home-time. Prior studies focused on patients with ischemic strokes enrolled in clinical trials<sup>4 9</sup> and few have described the relationship between home-time and mRS in the general population.<sup>5</sup> Understanding whether the association between home-time and mRS holds true in a population-based sample, in different stroke types, in important patient subgroups, as well as in different time periods is necessary to inform whether home-time can be used as an outcome metric to evaluate quality of stroke care. Finally, because home-time may be sensitive to the structures of healthcare systems, it is relevant to validate this metric in different jurisdictions.<sup>10</sup>

We aimed to determine the association between 90-day home-time and disability at discharge, measured using the mRS score, in a population-based cohort of patients with ischemic or

Confidential – Yu, AYX

1  
2  
3 hemorrhagic stroke. We hypothesized that home-time would be strongly associated with the  
4  
5 mRS score and that this association would not be significantly modified by stroke type, temporal  
6  
7 trends, or patient demographics.  
8  
9

## 10 11 12 **Methods**

### 13 14 Cohort identification

15  
16 We identified all hospital admissions for ischemic stroke or intracerebral hemorrhage in the  
17  
18 Ontario Stroke Registry (formerly known as the Registry of the Canadian Stroke Network)  
19  
20 between April 1st 2002 and March 31st 2013. The registry collected data on all consecutive  
21  
22 patients with stroke seen in the emergency department or admitted to regional stroke centres and  
23  
24 a simple random sample of patients from all other hospitals across Ontario, Canada's most  
25  
26 populous province with a population of 13 million people.<sup>11</sup> We excluded patients with  
27  
28 subarachnoid hemorrhage. Other exclusion criteria were patients aged less than 18 years, non-  
29  
30 residents of Ontario or those without a valid health insurance number, patients discharged against  
31  
32 medical advice or those who failed to return from a pass, patients living in a long-term care  
33  
34 centre at baseline, and any strokes occurring during hospitalization for a different health  
35  
36 condition. Only the first presentation was included in individuals who presented with stroke  
37  
38 more than once during the study period.  
39  
40  
41  
42  
43  
44  
45  
46

### 47 Outcomes and covariates

48  
49 The 90-day home-time was the primary outcome and was defined as the total number of days a  
50  
51 patient was living outside of a healthcare institution in the first 90 days after stroke. Home-time  
52  
53 was calculated for each individual patient using linked administrative health databases  
54  
55  
56  
57

Confidential – Yu, AYX

1  
2  
3 (Supplemental Table 1) by subtracting the number of days spent in emergency care, acute care,  
4 inpatient rehabilitation, long-term care institution, as well as any re-hospitalizations from the first  
5 90 days after the date of admission for the index event. By definition, patients who died during  
6 the index hospitalization have 0 home-time days. Patients who were discharged from health care  
7 institutions and subsequently died in the first 90 days after stroke may have accumulated home-  
8 time days. We also determined whether Ontario public home care services were provided to  
9 patients who were assumed to be at home. Canadian administrative databases include data on the  
10 entire population and have been extensively validated for research purposes.<sup>12</sup> These datasets  
11 were linked using unique encoded identifiers and analyzed at ICES.  
12  
13  
14  
15  
16  
17  
18  
19  
20  
21  
22  
23  
24  
25

26 Data on discharge mRS were obtained from the registry (<1% missing data). The mRS is an  
27 ordinal scale ranging from 0 for no symptoms, to 3 for moderate disability (able to walk without  
28 assistance, but requiring some help), to 5 for severe disability (bedridden, requiring constant  
29 nursing care), and to 6 for death.<sup>3</sup> Data validation by duplicate chart abstraction showed excellent  
30 agreement (kappa score or intraclass correlation coefficient of greater than 0.9) for key  
31 variables.<sup>13</sup>  
32  
33  
34  
35  
36  
37  
38  
39  
40  
41

42 The covariates in our analyses were age, sex, stroke type (ischemic stroke versus intracerebral  
43 hemorrhage), stroke severity (mild stroke defined as a National Institutes of Health Stroke Scale  
44 (NIHSS) < 5), Charlson comorbidity index (dichotomized to <2 or ≥ 2), independence in  
45 activities of daily living prior to the index stroke, location of residency (small population centre:  
46 less than 10,000, medium population centre: 10,000 to 100,000, and large urban population  
47 centre: >100,000), and neighborhood income quintile. The covariates were obtained from the  
48  
49  
50  
51  
52  
53  
54  
55  
56  
57  
58  
59  
60



Confidential – Yu, AYX

1  
2  
3 Ontario Stroke Registry, except for the Charlson comorbidity index, the location of residency,  
4 and the neighborhood income quintile which were obtained from linked administrative data.<sup>14</sup>  
5  
6  
7  
8  
9

## 10 Statistical methods

11  
12 Patient characteristics were described using proportions for categorical variables and median  
13 with 25<sup>th</sup> and 75<sup>th</sup> percentiles ( $Q_1, Q_3$ ) for continuous variables. We used Spearman's rank  
14 correlation to quantify the correlation between 90-day home-time and discharge mRS stratified  
15 by stroke type. Because the distribution of home-time is bucket-shaped with peaks around its  
16 minimum value (0) and maximum value (90), we considered four regression models: the  
17 negative binomial model, the Poisson model, and their respective zero-inflated counterparts.<sup>15</sup>  
18  
19 The zero-inflated negative binomial regression model best fit our observed data. Accordingly,  
20 this model was used to determine the association between discharge mRS and 90-day home-time  
21 with adjustment for the covariates. The zero-inflated negative binomial model yields two sets of  
22 regression coefficients: one from an underlying logistic model that is modeling excess zeros and  
23 one from an underlying negative binomial model for counts. To simplify presentation and  
24 interpretation of the two sets of regression coefficients, we used a previously described method  
25 for summarizing the effect of the predictor variables to yield an adjusted summary rate ratio  
26 (aRR), which is interpreted as the ratio of the mean number of home-time days among those  
27 exposed to the covariate of interest to the mean number of home-time days among those who  
28 were not.<sup>15</sup> We used bootstrapping to obtain 95% confidence intervals ( $CI_{95}$ ). In order to  
29 determine whether the association between home-time and mRS was significantly modified by  
30 stroke type, sex, age, and study year, we used likelihood ratio tests to compare the models with  
31 and without the appropriate multiplicative interaction terms. If a statistically significant  
32  
33  
34  
35  
36  
37  
38  
39  
40  
41  
42  
43  
44  
45  
46  
47  
48  
49  
50  
51  
52  
53  
54  
55  
56  
57  
58  
59  
60

Confidential – Yu, AYX

1  
2  
3 interaction was present, we reported the stratum-specific aRR derived from the model with the  
4  
5 appropriate main effects and interaction terms.  
6  
7  
8  
9

## 10 Research Ethics Approval

11  
12 ICES is an independent, non-profit research institute whose legal status under Ontario's health  
13  
14 information privacy law allows it to collect and analyze health care and demographic data,  
15  
16 without consent, for health system evaluation and improvement. The use of data in this project  
17  
18 was authorized under section 45 of Ontario's Personal Health Information Protection Act.  
19  
20  
21  
22  
23

## 24 Results

25  
26 Our study sample consisted of 39,417 patients (84% ischemic stroke and 16% intracerebral  
27  
28 hemorrhage), with a median ( $Q_1, Q_3$ ) age of 74 years (63,82), of whom 53% were male. Table 1  
29  
30 describes patient characteristics, disability at discharge, the median 90-day home-time, and the  
31  
32 location of the patient at 90 days by stroke type. The median 90-day home-time was 55 days  
33  
34 (0,82) for patients with ischemic stroke and 0 (0,58) for those with intracerebral hemorrhage. By  
35  
36 definition, patients who died during the index hospitalization (n=6,052, 15%) did not accumulate  
37  
38 any home-time days.  
39  
40  
41  
42  
43

44  
45 More 90-day home-time (i.e. more days at home) was associated with lower mRS at discharge  
46  
47 (i.e. less disability) for ischemic stroke (Spearman correlation coefficient -0.78) and intracerebral  
48  
49 hemorrhage (Spearman correlation coefficient -0.80). Table 2 shows the median ( $Q_1, Q_3$ ) and  
50  
51 mean (standard deviation) home-time for each mRS category as well as the results of the  
52  
53 multivariable zero-inflated negative binomial analyses.  
54  
55  
56  
57  
58  
59  
60

Confidential – Yu, AYX

1  
2  
3  
4  
5  
6 We showed that people with higher disability at discharge from the acute-care hospitalization  
7  
8 experienced less home-time. Compared to people discharged with no disability (mRS=0), those  
9  
10 discharged with minimal disability had slightly less home-time (mRS=1 aRR 0.96, CI<sub>95</sub>  
11  
12 [0.93,0.98]), but those discharged with the most severe disability had the least home-time  
13  
14 (mRS=5 aRR 0.05 CI<sub>95</sub> [0.04,0.05]). In addition, older people, those with a higher comorbidity  
15  
16 burden, and those with higher stroke severity experienced less home-time; while those who were  
17  
18 independent at baseline experienced more home-time (Table 2). Patients living in medium urban  
19  
20 regions had slightly more home-time than those living in small towns or in large urban regions.  
21  
22 Home-time was not associated with the neighborhood income quintile, a proxy for  
23  
24 socioeconomic status.<sup>14</sup>  
25  
26  
27  
28  
29  
30

31 Figure 1 shows the relationship between discharge mRS and 90-day home-time by stroke type,  
32  
33 age, sex, and study year. There was no evidence of effect modification by stroke type (p for  
34  
35 interaction=0.06), but there was a statistically significant interaction for age, sex, and study year  
36  
37 (p for interaction < 0.001 for all three covariates). In the sub-analysis by age, we observed that  
38  
39 for almost all levels of the mRS, except those with the most severe disability, older patients  
40  
41 experienced less home-time compared to their younger counterparts (Figure 2). In the sub-  
42  
43 analysis by sex, we observed that compared to women, men experienced slightly more home-  
44  
45 time in the subgroup of patients discharged with lower disability (mRS=1 aRR CI<sub>95</sub> 1.02  
46  
47 [1.00,1.05], mRS=2 aRR CI<sub>95</sub> 1.03 [1.00,1.05], and mRS=3 aRR CI<sub>95</sub> 1.05 [1.03,1.07]), but men  
48  
49 had less home-time among those with the most severe disability (mRS=5 aRR CI<sub>95</sub> 0.69  
50  
51 [0.52,0.92], Figure 3). Finally, in the sub-analysis by study years, despite a statistically  
52  
53  
54  
55  
56  
57  
58  
59  
60

Confidential – Yu, AYX

1  
2  
3 significant p-value for interaction, we did not observe any consistent or clinically meaningful  
4  
5 trends in effect modification (Supplemental Figure 1).  
6  
7  
8  
9

## 10 **Discussion**

11  
12 In this large population-based study of patients with stroke, we demonstrated that 90-day home-  
13  
14 time was associated with global disability as measured by the mRS at discharge, for both  
15  
16 ischemic stroke and intracerebral hemorrhage, and that this association was stable over an 11-  
17  
18 year period. We showed a clear gradient between home-time and functional outcomes, across the  
19  
20 levels of disability measured by the mRS, with people discharged from hospital with the highest  
21  
22 disability experiencing the least home-time. In addition, home-time was responsive to covariates  
23  
24 known to be associated with stroke outcomes as people who were older, dependent at baseline,  
25  
26 had higher comorbidity burden, or presented with severe strokes had less home-time.<sup>16 17</sup>  
27  
28  
29  
30  
31  
32

33 Home-time has been identified as a patient-centered outcome in stroke<sup>7</sup> as well as in other  
34  
35 medical conditions, such as cancer.<sup>8</sup> This metric is associated with healthcare costs and is  
36  
37 important to policy-makers.<sup>10 18</sup> With the availability of new stroke treatments; for example,  
38  
39 acute revascularization treatments up to 24 hours after stroke onset,<sup>19-21</sup> systematic evaluation of  
40  
41 outcomes with a graded and patient-centered metric is urgently needed for monitoring the quality  
42  
43 and equity of care across populations. Our findings support the use of home-time derived from  
44  
45 administrative data to study real-world stroke outcomes as well as in pragmatic clinical trials.<sup>22</sup>  
46  
47  
48  
49  
50  
51

52 Our inclusion of patients with intracerebral hemorrhage is important because home-time has not  
53  
54 yet been evaluated in this population, where acute treatment options are limited and systematic  
55  
56  
57  
58  
59  
60

Confidential – Yu, AYX

1  
2  
3 evaluation of outcomes may be particularly relevant for testing potential treatments or  
4  
5 identifying prognostic markers.<sup>23</sup> Further, the temporal stability of the relationship between  
6  
7 home-time and mRS is important for studies on temporal trends in stroke outcomes. The sex  
8  
9 differences in the relationship between home-time and mRS are of small magnitude, suggesting  
10  
11 that home-time is a valid indicator for post-stroke disability in both men and women.  
12  
13  
14

15  
16  
17 In the stratified analysis by age, we found that compared to younger patients, older ones with the  
18  
19 same degree of disability at discharge experienced less home-time. For example, considering that  
20  
21 the mean home-time for patients discharged with mild disability (mRS=1) was 77 days, an aRR  
22  
23 of 0.96 for patients aged 71-80 years compared to those aged 21-60 years translates into a  
24  
25 difference of 3 days and an aRR of 0.90 for those older than 80 years translates into a difference  
26  
27 of 8 days. This gradient was not seen in patients with severe disability (mRS=5), likely because  
28  
29 few home-time days were accumulated overall in this category. Older patients are likely  
30  
31 experiencing less home-time compared to younger ones because of more comorbid medical  
32  
33 illnesses, post-stroke complications, and higher pre-stroke dependence.<sup>16 17</sup> Stratified analyses by  
34  
35 age groups may be necessary when using home-time to investigate outcomes after stroke.  
36  
37  
38  
39  
40  
41

42  
43 Our findings are consistent with other studies calibrating home-time with the mRS in patients  
44  
45 with ischemic stroke enrolled in clinical trials<sup>4 6 9</sup> as well as in United States (U.S.) Medicare  
46  
47 beneficiaries admitted to hospital with ischemic stroke.<sup>5 24</sup> Home-time is likely influenced by the  
48  
49 organization of healthcare systems.<sup>6 10</sup> Although we were unable to perform direct comparisons,  
50  
51 we found that the median home-time after ischemic stroke in Ontario (55 days [0,82]) was less  
52  
53 than that reported in the U.S. (79 days [52,86]),<sup>5</sup> suggesting that home-time should be calibrated  
54  
55  
56  
57  
58  
59  
60

Confidential – Yu, AYX

1  
2  
3 in the setting where it is intended to be used. A recent study using data from the Scottish  
4  
5 National Health Service reported a mean home-time of 49 days after ischemic stroke and 27 days  
6  
7 after intracerebral hemorrhage,<sup>25</sup> which is similar to our findings (46 days after ischemic stroke  
8  
9 and 26 days after intracerebral hemorrhage). Both Canadian and Scottish health systems operate  
10  
11 under a single-payer universal healthcare model. Understanding home-time in different health  
12  
13 systems will inform the use of this metric as a pragmatic outcome in multinational studies.  
14  
15

16  
17  
18  
19 The strengths of our study are its population-based design, the inclusion of patients with  
20  
21 intracerebral hemorrhages, the large sample size, and the long study duration allowing for the  
22  
23 evaluation of temporal trends. Our study nevertheless has limitations. First, the registry database  
24  
25 only includes mRS at the time of discharge and the 90-day mRS was not available for analysis.  
26  
27 While disability may change between discharge and 90 days, early disability has been shown to  
28  
29 be a predictor of outcome at 90 days.<sup>26</sup> Further, we showed strong associations between home-  
30  
31 time and discharge mRS in subgroup analyses, providing validity for the clinical relevance of  
32  
33 home-time. Second, returning home may be contingent on social support or private funds, which  
34  
35 are not captured in the administrative data calculation of home-time. We did however include  
36  
37 neighborhood income quintile as a measure of socioeconomic status and did not find an  
38  
39 association with home-time. We also included the use of publicly-funded home care services,  
40  
41 which may range from a few hours a week to a few hours a day for assistance with activities of  
42  
43 daily living or instrumental activities of daily living, but these do not include around the clock  
44  
45 support. Finally, admission to long-term care may be underestimated prior to the fiscal year  
46  
47 2009/2010 because the Continuing Care Reporting System Long-Term Care database was  
48  
49  
50  
51  
52  
53  
54  
55  
56  
57  
58  
59  
60

Confidential – Yu, AYX

1  
2  
3 incomplete<sup>27</sup>, but we did not find any clinically meaningful differences in the association  
4  
5 between mRS and home-time by study years.  
6  
7  
8  
9

## 10 **Conclusions**

11 Home-time is associated with global disability after ischemic stroke and intracerebral  
12 hemorrhage. Its key advantage is that it can be calculated using routinely collected administrative  
13 data, allowing for the measurement of stroke outcomes for large populations. Our findings  
14 inform the application of home-time as a quality indicator of stroke care and its use as a  
15 pragmatic outcome in stroke health services research.  
16  
17  
18  
19  
20  
21  
22  
23  
24  
25

## 26 **References**

- 27 1. Krueger H, Koot J, Hall RE, et al. Prevalence of Individuals Experiencing the Effects of Stroke in Canada:  
28 Trends and Projections. *Stroke* 2015;46(8):2226-31. doi: 10.1161/strokeaha.115.009616  
29 [published Online First: 2015/07/25]
- 30 2. Heart and Stroke Foundation. Stroke Report 2016 2016 [Accessed March 2017,  
31 <http://www.strokebestpractices.ca/index.php/news-feature/stroke-report-16-just-released/>].  
32 Available from: <http://www.strokebestpractices.ca/index.php/news-feature/stroke-report-2016-just-released/> accessed March.
- 33 3. Quinn TJ, Dawson J, Walters MR, et al. Functional outcome measures in contemporary stroke trials.  
34 *Int J Stroke* 2009;4(3):200-5. doi: 10.1111/j.1747-4949.2009.00271.x [published Online First:  
35 2009/08/08]
- 36 4. Quinn TJ, Dawson J, Lees JS, et al. Time spent at home poststroke: "home-time" a meaningful and  
37 robust outcome measure for stroke trials. *Stroke; a journal of cerebral circulation*  
38 2008;39(1):231-33. doi: STROKEAHA.107.493320 [pii]
- 39 5. Fonarow GC, Liang L, Thomas L, et al. Assessment of Home-Time After Acute Ischemic Stroke in  
40 Medicare Beneficiaries. *Stroke; a journal of cerebral circulation* 2016;47(3):836-42. doi:  
41 10.1161/STROKEAHA.115.011599 [doi]
- 42 6. Yu AYX, Rogers E, Wang M, et al. Population-based study of home-time by stroke type and correlation  
43 with modified Rankin score. *Neurology* 2017;89(19):1970-76. doi:  
44 10.1212/wnl.0000000000004631 [published Online First: 2017/10/13]
- 45 7. Xian Y, O'Brien EC, Fonarow GC, et al. Patient-Centered Research into Outcomes Stroke Patients  
46 Prefer and Effectiveness Research: Implementing the patient-driven research paradigm to aid  
47 decision making in stroke care. *American Heart Journal* 2015;170(1):36-45, 45.e1-11. doi:  
48 10.1016/j.ahj.2015.04.008 [doi]
- 49 8. Groff AC, Colla CH, Lee TH. Days Spent at Home - A Patient-Centered Goal and Outcome. *N Engl J Med*  
50 2016;375(17):1610-12. doi: 10.1056/NEJMp1607206 [published Online First: 2016/10/27]



Confidential – Yu, AYX

- 1
  - 2
  - 3
  - 4
  - 5
  - 6
  - 7
  - 8
  - 9
  - 10
  - 11
  - 12
  - 13
  - 14
  - 15
  - 16
  - 17
  - 18
  - 19
  - 20
  - 21
  - 22
  - 23
  - 24
  - 25
  - 26
  - 27
  - 28
  - 29
  - 30
  - 31
  - 32
  - 33
  - 34
  - 35
  - 36
  - 37
  - 38
  - 39
  - 40
  - 41
  - 42
  - 43
  - 44
  - 45
  - 46
  - 47
  - 48
  - 49
  - 50
  - 51
  - 52
  - 53
  - 54
  - 55
  - 56
  - 57
  - 58
  - 59
  - 60
9. Mishra NK, Shuaib A, Lyden P, et al. Home time is extended in patients with ischemic stroke who receive thrombolytic therapy: a validation study of home time as an outcome measure. *Stroke* 2011;42(4):1046-50. doi: 10.1161/STROKEAHA.110.601302
10. Barnett ML, Grabowski DC, Mehrotra A. Home-to-Home Time - Measuring What Matters to Patients and Payers. *N Engl J Med* 2017;377(1):4-6. doi: 10.1056/NEJMp1703423 [published Online First: 2017/07/06]
11. Institute for Clinical Evaluative Sciences (ICES). Ontario Stroke Registry 2017 [<http://www.ices.on.ca/Research/Research-programs/Cardiovascular/Ontario-Stroke-Registry> Accessed April 2 2017]. Available from: <http://www.ices.on.ca/Research/Research-programs/Cardiovascular/Ontario-Stroke-Registry> accessed April 2017.
12. Juurlink D, Preyra C, Croxford R, et al. Canadian Institute for Health Information Discharge Abstract Database: A Validation Study Toronto: Institute for Clinical Evaluative Sciences; [<https://www.ices.on.ca/publications/atlas-and-reports/2006/canadian-institute-for-health-information> Published June 06. Accessed April 24 18.]. Available from: <https://www.ices.on.ca/publications/atlas-and-reports/2006/canadian-institute-for-health-information> accessed April 24 2018.
13. Kapral MK, Hall R, Stampelcoski M, et al. Registry of the Canadian Stroke Network - Report on the 2008/09 Ontario Stroke Audit. Toronto: Institute for Clinical Evaluative Sciences, 2011.
14. Kapral MK, Fang J, Chan C, et al. Neighborhood income and stroke care and outcomes. *Neurology* 2012;79(12):1200-7. doi: 10.1212/WNL.0b013e31826aac9b [published Online First: 2012/08/17]
15. Weaver CG, Ravani P, Oliver MJ, et al. Analyzing hospitalization data: potential limitations of Poisson regression. *Nephrol Dial Transplant* 2015;30(8):1244-9. doi: 10.1093/ndt/gfv071 [published Online First: 2015/03/31]
16. Smith EE, Shobha N, Dai D, et al. Risk score for in-hospital ischemic stroke mortality derived and validated within the Get With the Guidelines-Stroke Program. *Circulation* 2010;122(15):1496-504. doi: 10.1161/CIRCULATIONAHA.109.932822
17. Rost NS, Bottle A, Lee JM, et al. Stroke Severity Is a Crucial Predictor of Outcome: An International Prospective Validation Study. *J Am Heart Assoc* 2016;5(1):e002433. doi: 10.1161/jaha.115.002433 [published Online First: 2016/01/23]
18. Andersen SK, Croxford R, Earle CC, et al. Days at Home in the Last 6 Months of Life: A Patient-Determined Quality Indicator for Cancer Care. *Journal of oncology practice* 2019;15(4):e308-e15. doi: 10.1200/jop.18.00338 [published Online First: 2019/03/09]
19. Albers GW, Marks MP, Kemp S, et al. Thrombectomy for Stroke at 6 to 16 Hours with Selection by Perfusion Imaging. *N Engl J Med* 2018;378(8):708-18. doi: 10.1056/NEJMoa1713973 [published Online First: 2018/01/25]
20. Nogueira RG, Jadhav AP, Haussen DC, et al. Thrombectomy 6 to 24 Hours after Stroke with a Mismatch between Deficit and Infarct. *N Engl J Med* 2018;378(1):11-21. doi: 10.1056/NEJMoa1706442 [published Online First: 2017/11/14]
21. Thomalla G, Simonsen CZ, Boutitie F, et al. MRI-Guided Thrombolysis for Stroke with Unknown Time of Onset. *N Engl J Med* 2018;379(7):611-22. doi: 10.1056/NEJMoa1804355 [published Online First: 2018/05/17]
22. Li G, Sajobi TT, Menon BK, et al. Registry-based randomized controlled trials- what are the advantages, challenges, and areas for future research? *J Clin Epidemiol* 2016;80:16-24. doi: 10.1016/j.jclinepi.2016.08.003 [published Online First: 2016/10/22]
23. Cordonnier C, Demchuk A, Ziai W, et al. Intracerebral haemorrhage: current approaches to acute management. *Lancet* 2018;392(10154):1257-68. doi: 10.1016/s0140-6736(18)31878-6 [published Online First: 2018/10/16]



Confidential – Yu, AYW

- 1  
2  
3  
4  
5  
6  
7  
8  
9  
10  
11  
12  
13  
14  
15  
16  
17  
18  
19  
20  
21  
22  
23  
24  
25  
26  
27  
28  
29  
30  
31  
32  
33  
34  
35  
36  
37  
38
24. O'Brien EC, Xian Y, Xu H, et al. Hospital Variation in Home-Time After Acute Ischemic Stroke: Insights From the PROSPER Study (Patient-Centered Research Into Outcomes Stroke Patients Prefer and Effectiveness Research). *Stroke* 2016;47(10):2627-33. doi: 10.1161/STROKEAHA.116.013563
  25. McDermid I, Barber M, Dennis M, et al. Home-Time Is a Feasible and Valid Stroke Outcome Measure in National Datasets. *Stroke* 2019;50(5):1282-85. doi: 10.1161/strokeaha.118.023916 [published Online First: 2019/03/22]
  26. Ovbiagele B, Lyden PD, Saver JL. Disability status at 1 month is a reliable proxy for final ischemic stroke outcome. *Neurology* 2010;75(8):688-92. doi: 10.1212/WNL.0b013e3181eee426 [published Online First: 2010/08/25]
  27. Mojaverian N, Ng R, Hsu A, et al. Validation of incident long-term care admissions in Ontario using administrative data (oral abstract) Toronto, Ontario2017 [Available from: [https://www.cahspr.ca/web/uploads/conference/2017-05-24\\_Oral\\_Presentations.pdf](https://www.cahspr.ca/web/uploads/conference/2017-05-24_Oral_Presentations.pdf) accessed December 3 2018.

39  
40  
41  
42  
43  
44  
45  
46  
47  
48  
49  
50  
51  
52  
53  
54  
55  
56  
57  
58  
59  
60

**Acknowledgements:** This study was supported by ICES, which is funded by an annual grant from the Ontario Ministry of Health and Long-Term Care (MOHLTC). The opinions, results and conclusions reported in this paper are those of the authors and are independent from the funding sources. No endorsement by ICES or the Ontario MOHLTC is intended or should be inferred. Parts of this material are based on data and/or information compiled and provided by Canadian Institute for Health Information (CIHI). However, the analyses, conclusions, opinions and statements expressed in the material are those of the author(s), and not necessarily those of CIHI.

**Funding statement:** This work was supported by the Canadian Institutes of Health Research Catalyst Grant number 385156. Drs. Austin and Kapral hold Mid-Career Investigator Awards from the Heart & Stroke Foundation of Canada.

**Competing interest statement:** Dr. Yu, Dr. Fang, Ms. Porter, Dr. Austin, Dr. Smith, and Dr. Kapral report no competing interests.

Confidential – Yu, AYX

1  
2  
3 **Contributorship statement:** Dr. Yu contributed to the study concept and design, interpretation  
4 of data, drafting and revision of the manuscript. Dr. Fang contributed to the acquisition, analysis  
5 and interpretation of the data, and revision of the manuscript. Ms. Porter contributed to the  
6 acquisition, analysis and interpretation of the data, and revision of the manuscript. Dr. Austin  
7 contributed to data analysis and interpretation and revision of the manuscript. Dr. Smith  
8 contributed to the study concept and design, interpretation of data, and revision of the  
9 manuscript. Dr. Kapral contributed to the study concept and design, acquisition and  
10 interpretation of data, and revision of the manuscript.  
11  
12  
13  
14  
15  
16  
17  
18  
19  
20  
21  
22  
23

24 **Data sharing statement:** The dataset from this study is held securely in coded form at ICES.

25  
26 While data sharing agreements prohibit ICES from making the dataset publicly available, access  
27 may be granted to those who meet pre-specified criteria for confidential access.  
28  
29  
30  
31  
32

33 **Patient and Public Involvement:** No patient involved.  
34  
35  
36  
37  
38  
39  
40  
41  
42  
43  
44  
45  
46  
47  
48  
49  
50  
51  
52  
53  
54  
55  
56  
57  
58  
59  
60

Confidential – Yu, AXX

Table 1 Patient baseline characteristics, disability at discharge, and 90-day location

|                                                                       | <b>All<br/>(n=39,417)</b> | <b>Ischemic stroke<br/>(n=32,982)</b> | <b>ICH<br/>(n=6,435)</b> |
|-----------------------------------------------------------------------|---------------------------|---------------------------------------|--------------------------|
| <b>Median age (Q<sub>1</sub>,Q<sub>3</sub>)</b>                       | 74 (63,82)                | 75 (64,83)                            | 71 (59,80)               |
| <b>Male sex</b>                                                       | 20,693 (52.5%)            | 17,201 (52.2%)                        | 3,492 (54.3%)            |
| <b>Median NIHSS (Q<sub>1</sub>,Q<sub>3</sub>)</b>                     | 5 (2,12)                  | 5 (2,11)                              | 9 (2,16)                 |
| <b>Minor stroke (NIHSS&lt;5)</b>                                      | 16,113 (40.9%)            | 14,205 (43.1%)                        | 1,908 (29.7%)            |
| <b>Home location</b>                                                  |                           |                                       |                          |
| Large urban                                                           | 31,238 (79.3%)            | 26,028 (78.9%)                        | 5,210 (81.0%)            |
| Medium population                                                     | 3,120 (7.9%)              | 2,627 (8.0%)                          | 493 (7.7%)               |
| Small population                                                      | 5,059 (12.8%)             | 4,327 (13.1%)                         | 732 (11.4%)              |
| <b>Neighborhood income quintile</b>                                   |                           |                                       |                          |
| Lowest                                                                | 9,161 (23.2%)             | 7,748 (23.5%)                         | 1,413 (22.0%)            |
| Next to lowest                                                        | 8,446 (21.4%)             | 7,069 (21.4%)                         | 1,377 (21.4%)            |
| Middle                                                                | 7,483 (19.0%)             | 6,217 (18.8%)                         | 1,266 (19.7%)            |
| Next to highest                                                       | 7,083 (18.0%)             | 5,897 (17.9%)                         | 1,186 (18.4%)            |
| Highest                                                               | 7,244 (18.4%)             | 6,051 (18.3%)                         | 1,193 (18.5%)            |
| <b>Baseline independence</b>                                          | 29,688 (75.3%)            | 24,691 (74.9%)                        | 4,997 (77.7%)            |
| <b>CCI ≥ 2</b>                                                        | 20,851 (52.9%)            | 17,775 (53.9%)                        | 3,076 (47.8%)            |
| <b>Diabetes</b>                                                       | 10,095 (25.6%)            | 8,869 (26.9%)                         | 1,226 (19.1%)            |
| <b>Hypertension</b>                                                   | 27,156 (68.9%)            | 23,136 (70.1%)                        | 4,020 (62.5%)            |
| <b>Dyslipidemia</b>                                                   | 15,160 (38.5%)            | 13,307 (40.3%)                        | 1,853 (28.8%)            |
| <b>Active smoking</b>                                                 | 7,174 (18.2%)             | 6,251 (19.0%)                         | 923 (14.3%)              |
| <b>Prior stroke</b>                                                   | 7,131 (18.1%)             | 6,231 (18.9%)                         | 900 (14.0%)              |
| <b>Atrial fibrillation</b>                                            | 7,150 (18.1%)             | 6,232 (18.9%)                         | 918 (14.3%)              |
| <b>Coronary artery disease</b>                                        | 9,168 (23.3%)             | 8,210 (24.9%)                         | 958 (14.9%)              |
| <b>Dementia</b>                                                       | 2,780 (7.1%)              | 2,342 (7.1%)                          | 438 (6.8%)               |
| <b>Median acute care length of stay (Q<sub>1</sub>,Q<sub>3</sub>)</b> | 9 (5,18)                  | 9 (5,17)                              | 10 (4,24)                |
| <b>Discharge mRS</b>                                                  |                           |                                       |                          |
| Median mRS (Q <sub>1</sub> ,Q <sub>3</sub> )                          | 3 (2,4)                   | 3 (2,4)                               | 4 (3,6)                  |
| mRS = 0                                                               | 2,513 (6.4%)              | 2,263 (6.8%)                          | 250 (3.9%)               |
| mRS = 1                                                               | 4,495 (11.4%)             | 4,073 (12.3%)                         | 422 (6.6%)               |
| mRS = 2                                                               | 6,429 (16.3%)             | 5,896 (17.9%)                         | 533 (8.3%)               |
| mRS = 3                                                               | 8,413 (21.3%)             | 7,423 (22.5%)                         | 990 (15.4%)              |
| mRS = 4                                                               | 9,372 (23.8%)             | 7,772 (23.6%)                         | 1,600 (24.9%)            |
| mRS = 5                                                               | 2,143 (5.4%)              | 1,609 (4.9%)                          | 534 (8.3%)               |
| mRS = 6                                                               | 6,052 (15.4%)             | 3,946 (12.0%)                         | 2,106 (32.7%)            |
| <b>Median 90-day home-time (Q<sub>1</sub>,Q<sub>3</sub>)</b>          | 47 (0,81)                 | 55 (0,82)                             | 0 (0,58)                 |
| <b>Mean 90-day home-time (SD)</b>                                     | 42 (36)                   | 46 (36)                               | 26 (34)                  |
| <b>90-day location</b>                                                |                           |                                       |                          |
| Acute care                                                            | 1,686 (4.3%)              | 1,367 (4.1%)                          | 319 (5.0%)               |
| Rehabilitation                                                        | 1,816 (4.6%)              | 1,412 (4.3%)                          | 404 (6.3%)               |
| LTC/CCC                                                               | 2,910 (7.4%)              | 2,408 (7.3%)                          | 502 (7.8%)               |

Confidential – Yu, AYX

|                        |                |                |               |
|------------------------|----------------|----------------|---------------|
| Death                  | 8,083 (20.5%)  | 5,628 (17.1%)  | 2,455 (38.2%) |
| Home with home-care    | 2,140 (5.4%)   | 1,913 (5.8%)   | 227 (3.5%)    |
| Home without home-care | 22,782 (57.8%) | 20,254 (61.4%) | 2,528 (39.3%) |

Q<sub>1</sub>, Q<sub>3</sub>: 25<sup>th</sup> and 75<sup>th</sup> percentile, SD: standard deviation, ICH: intracerebral hemorrhage, NIHSS: National Institutes of Health Stroke Scale, CCI: Charlson comorbidity index, mRS: modified Rankin Scale (0-no symptoms, 1-no significant disability despite symptoms, 2- slight disability, 3-moderate disability, 4-moderately severe disability, 5-severe disability, 6-dead), LTC/CCC: long-term care/complex continuing care

Confidential – Yu, AYX

Table 2 Adjusted summary rate ratio of home-time by predictor variables using multivariable zero-inflated negative binomial model

| Predictor variables                 | Median home-time (Q <sub>1</sub> ,Q <sub>3</sub> ) | Mean home-time (SD) | aRR [CI <sub>95</sub> ] |
|-------------------------------------|----------------------------------------------------|---------------------|-------------------------|
| <b>Age categories</b>               |                                                    |                     |                         |
| 21-60 years                         | 68 (12,84)                                         | 53 (35)             | Reference               |
| 61-70 years                         | 60 (0,83)                                          | 48 (36)             | 0.97 [0.95,0.99]        |
| 71-80 years                         | 46 (0,80)                                          | 42 (36)             | 0.94 [0.92,0.95]        |
| ≥ 80 years                          | 12 (0,71)                                          | 32 (35)             | 0.89 [0.87,0.91]        |
| <b>Sex</b>                          |                                                    |                     |                         |
| Female                              | 40 (0,79)                                          | 40 (36)             | Reference               |
| Male                                | 53 (0,82)                                          | 45 (36)             | 1.01 [0.99,1.02]        |
| <b>mRS category</b>                 |                                                    |                     |                         |
| mRS 0                               | 84 (81,87)                                         | 80 (16)             | Reference               |
| mRS 1                               | 84 (79,86)                                         | 77 (19)             | 0.96 [0.93,0.98]        |
| mRS 2                               | 81 (68,85)                                         | 73 (21)             | 0.92 [0.90,0.94]        |
| mRS 3                               | 57 (29,76)                                         | 50 (29)             | 0.60 [0.59,0.62]        |
| mRS 4                               | 9 (0,45)                                           | 23 (27)             | 0.23 [0.22,0.24]        |
| mRS 5                               | 0 (0,3)                                            | 7 (17)              | 0.05 [0.04,0.06]        |
| <b>Home location</b>                |                                                    |                     |                         |
| Large urban                         | 46 (0,81)                                          | 42 (36)             | Reference               |
| Medium population                   | 50 (0,82)                                          | 43 (37)             | 1.04 [1.02,1.07]        |
| Small population                    | 53 (0,82)                                          | 44 (37)             | 1.02 [1.00,1.04]        |
| <b>Neighborhood income quintile</b> |                                                    |                     |                         |
| Lowest                              | 43 (0,80)                                          | 41 (36)             | Reference               |
| Next to lowest                      | 46 (0,81)                                          | 42 (36)             | 1.02 [0.99,1.04]        |
| Middle                              | 49 (0,81)                                          | 43 (36)             | 1.02 [1.00,1.04]        |
| Next to highest                     | 50 (0,81)                                          | 43 (36)             | 1.02 [0.99,1.04]        |
| Highest                             | 50 (0,82)                                          | 43 (36)             | 1.02 [1.00,1.05]        |
| <b>Charlson comorbidity index</b>   |                                                    |                     |                         |
| Score < 2                           | 62 (0,83)                                          | 49 (36)             | Reference               |
| Score ≥ 2                           | 30 (0,76)                                          | 36 (36)             | 0.91 [0.90,0.93]        |
| <b>Pre-admission dependence</b>     |                                                    |                     |                         |
| Dependent                           | 7 (0,68)                                           | 30 (35)             | Reference               |
| Independent                         | 56 (0,82)                                          | 46 (36)             | 1.06 [1.04,1.08]        |
| <b>Stroke severity</b>              |                                                    |                     |                         |
| Mild (NIHSS < 5)                    | 78 (46,85)                                         | 62 (30)             | Reference               |
| Severe (NIHSS ≥ 5)                  | 5 (0,63)                                           | 29 (34)             | 0.82 [0.80,0.83]        |

Confidential – Yu, AYX

1  
2  
3 Q<sub>1</sub>,Q<sub>3</sub>: First and third quartile, SD: standard deviation, aRR: adjusted summary rate ratio, CI<sub>95</sub>:  
4  
5 95% confidence intervals, NIHSS: National Institutes of Health Stroke Scale  
6  
7  
8  
9  
10  
11  
12  
13  
14  
15  
16  
17  
18  
19  
20  
21  
22  
23  
24  
25  
26  
27  
28  
29  
30  
31  
32  
33  
34  
35  
36  
37  
38  
39  
40  
41  
42  
43  
44  
45  
46  
47  
48  
49  
50  
51  
52  
53  
54  
55  
56  
57  
58  
59  
60

For peer review only

Confidential – Yu, AYX

1  
2  
3 Figure 1 Box plots of home-time by mRS stratified by stroke type (A), age (B), sex (C), and  
4  
5 study years (D)  
6  
7  
8  
9

10 Figure 2 Age-specific adjusted summary rate ratio for 90-day home-time by mRS with ages 21-  
11  
12 60 years as the reference group  
13  
14  
15

16  
17 Figure 3 Sex-specific adjusted summary rate ratio for 90-day home-time by mRS with female as  
18  
19 the reference group  
20  
21  
22  
23  
24  
25  
26  
27  
28  
29  
30  
31  
32  
33  
34  
35  
36  
37  
38  
39  
40  
41  
42  
43  
44  
45  
46  
47  
48  
49  
50  
51  
52  
53  
54  
55  
56  
57  
58  
59  
60

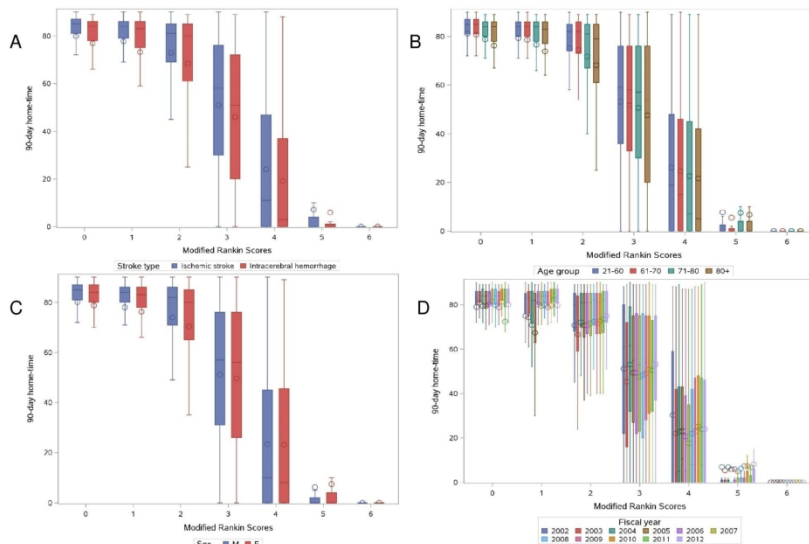

Figure 1 Box plots of home-time by mRS stratified by stroke type (A), age (B), sex (C), and study years (D)

279x215mm (300 x 300 DPI)



1  
2  
3  
4  
5  
6  
7  
8  
9  
10  
11  
12  
13  
14  
15  
16  
17  
18  
19  
20  
21  
22  
23  
24  
25  
26  
27  
28  
29  
30  
31  
32  
33  
34  
35  
36  
37  
38  
39  
40  
41  
42  
43  
44  
45  
46  
47  
48  
49  
50  
51  
52  
53  
54  
55  
56  
57  
58  
59  
60

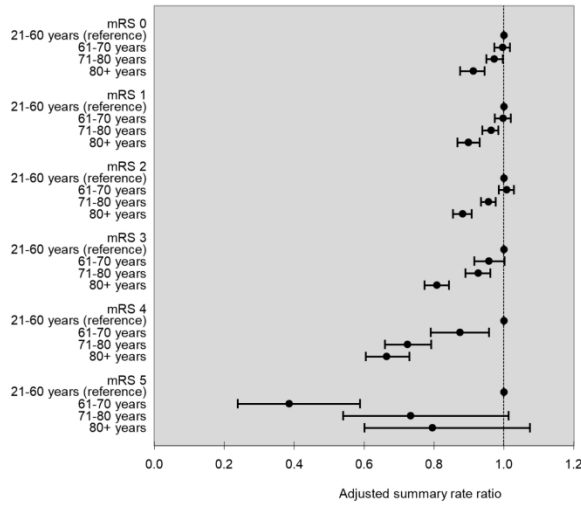

Figure 2 Age-specific adjusted summary rate ratio for 90-day home-time by mRS with ages 21-60 years as the reference group

215x279mm (300 x 300 DPI)

1  
2  
3  
4  
5  
6  
7  
8  
9  
10  
11  
12  
13  
14  
15  
16  
17  
18  
19  
20  
21  
22  
23  
24  
25  
26  
27  
28  
29  
30  
31  
32  
33  
34  
35  
36  
37  
38  
39  
40  
41  
42  
43  
44  
45  
46  
47  
48  
49  
50  
51  
52  
53  
54  
55  
56  
57  
58  
59  
60

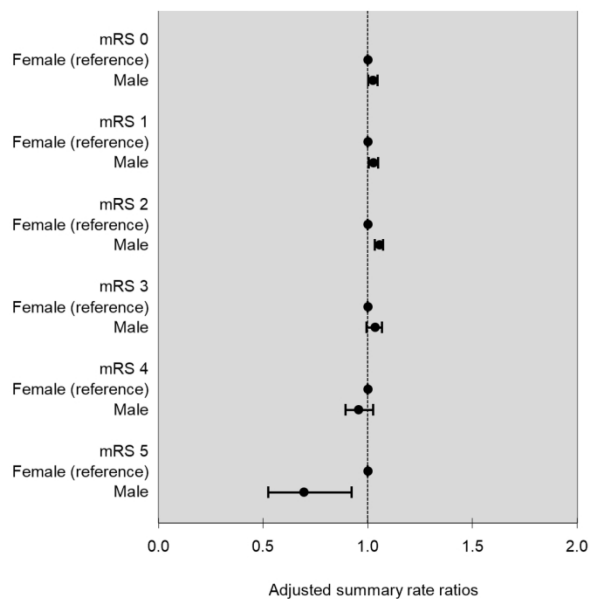

Figure 3 Sex-specific adjusted summary rate ratio for 90-day home-time by mRS with female as the reference group

215x279mm (300 x 300 DPI)

Supplemental Table 1 Administrative data sources

| Database              | Full database name                              | Description                        |
|-----------------------|-------------------------------------------------|------------------------------------|
| DAD                   | Discharge Abstract Database                     | Inpatient hospitalization data     |
| NACRS                 | National Ambulatory Care Reporting System       | Emergency department data          |
| NRS                   | National Rehabilitation Reporting System        | Rehabilitation data                |
| CCRS                  | Continuing Care Reporting System                | Complex continuing care            |
| CCRS-LTC <sup>a</sup> | Continuing Care Reporting System Long-Term Care | Long-term care data                |
| HCD                   | Ontario home care database                      | Home-care data                     |
| OHIP                  | Ontario Health Insurance Plan                   | Outpatient physician billings data |
| ODBP                  | Ontario Drug Benefit Program                    | Pharmacy data                      |
| RPDB                  | Ontario Registered Persons Database             | Mortality data                     |
| OSR                   | Ontario Stroke Registry                         | Disease-specific registry          |

<sup>a</sup>CCRS-LTC was incomplete prior to the 2009/2010 fiscal year. To identify patients admitted to long-term care prior to 2009/2010, we used a validated algorithm with 2 ODB records or 2 OHIP records or 1 ODB and 1 OHIP record within 30 days of each other with a long-term code flag. The date of admission to long-term care was defined as the date of the first record.

Supplemental Figure 1 Study year-specific adjusted summary rate ratio for 90-day home-time by mRS with year 2007 as the reference group

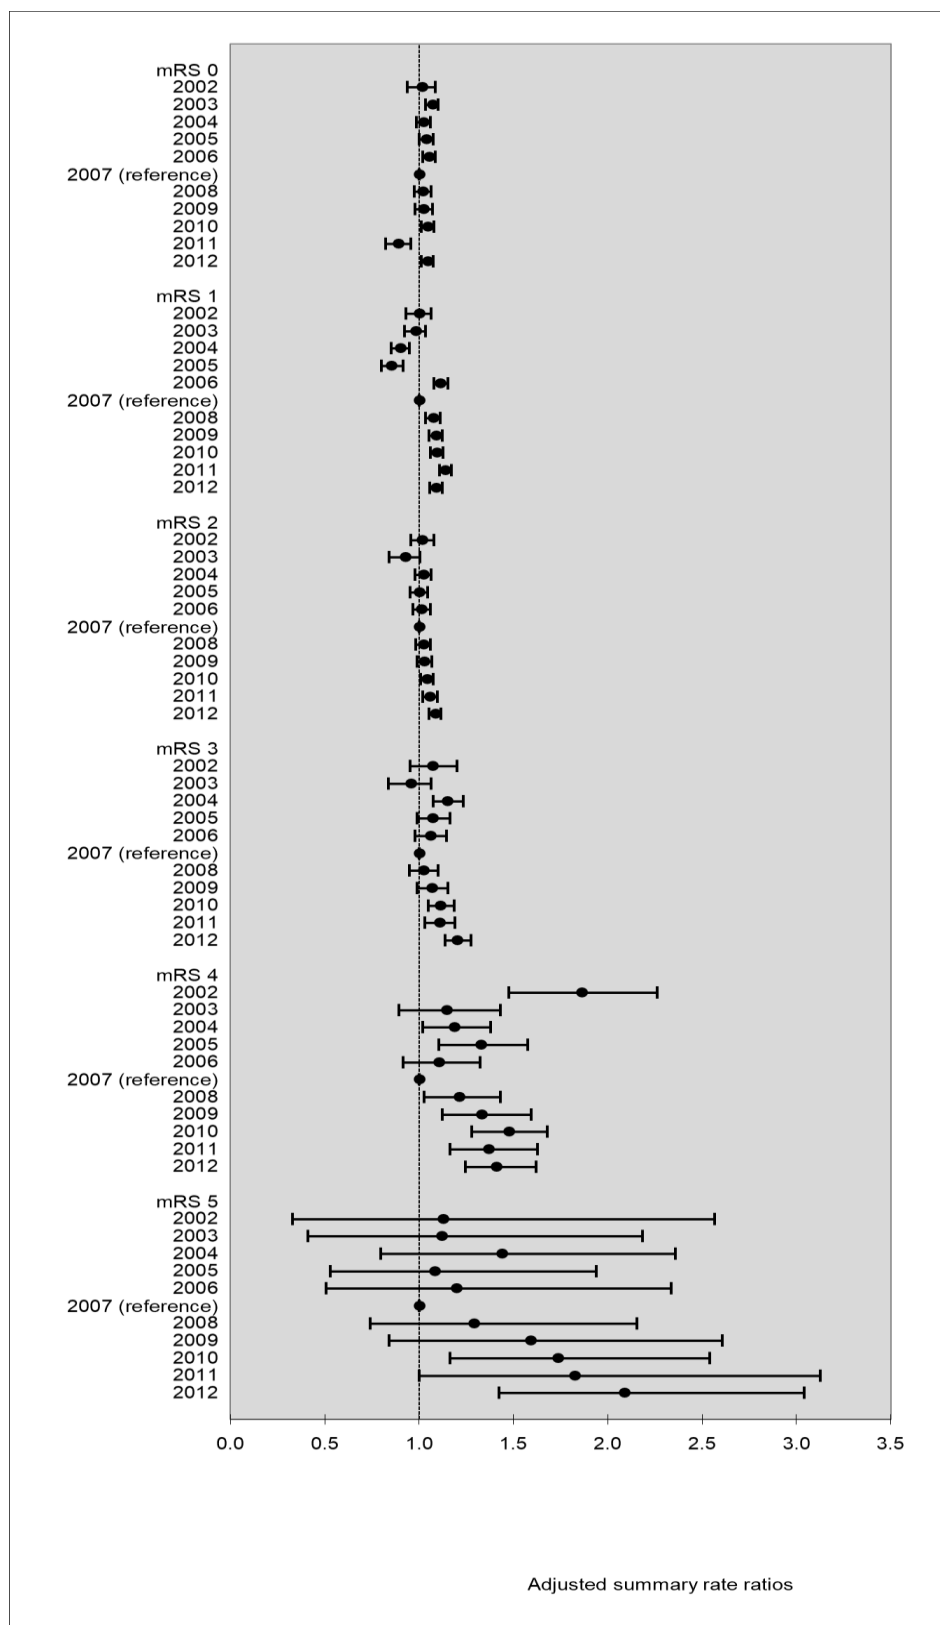

STROBE Statement—Checklist of items that should be included in reports of *cohort studies*

|                              | Item No | Recommendation                                                                                                                                                                                                                                                                                                                                                                                                |               |
|------------------------------|---------|---------------------------------------------------------------------------------------------------------------------------------------------------------------------------------------------------------------------------------------------------------------------------------------------------------------------------------------------------------------------------------------------------------------|---------------|
| <b>Title and abstract</b>    | 1       | (a) Indicate the study's design with a commonly used term in the title or the abstract<br>(b) Provide in the abstract an informative and balanced summary of what was done and what was found                                                                                                                                                                                                                 | p. 1<br>p. 2  |
| <b>Introduction</b>          |         |                                                                                                                                                                                                                                                                                                                                                                                                               |               |
| Background/rationale         | 2       | Explain the scientific background and rationale for the investigation being reported                                                                                                                                                                                                                                                                                                                          | p. 4          |
| Objectives                   | 3       | State specific objectives, including any prespecified hypotheses                                                                                                                                                                                                                                                                                                                                              | p. 5          |
| <b>Methods</b>               |         |                                                                                                                                                                                                                                                                                                                                                                                                               |               |
| Study design                 | 4       | Present key elements of study design early in the paper                                                                                                                                                                                                                                                                                                                                                       | p. 5          |
| Setting                      | 5       | Describe the setting, locations, and relevant dates, including periods of recruitment, exposure, follow-up, and data collection                                                                                                                                                                                                                                                                               | p. 5–6        |
| Participants                 | 6       | (a) Give the eligibility criteria, and the sources and methods of selection of participants. Describe methods of follow-up<br>(b) For matched studies, give matching criteria and number of exposed and unexposed                                                                                                                                                                                             | p. 6–7<br>N/A |
| Variables                    | 7       | Clearly define all outcomes, exposures, predictors, potential confounders, and effect modifiers. Give diagnostic criteria, if applicable                                                                                                                                                                                                                                                                      | p. 6–7        |
| Data sources/<br>measurement | 8*      | For each variable of interest, give sources of data and details of methods of assessment (measurement). Describe comparability of assessment methods if there is more than one group                                                                                                                                                                                                                          | p. 6–7        |
| Bias                         | 9       | Describe any efforts to address potential sources of bias                                                                                                                                                                                                                                                                                                                                                     | p. 6–7        |
| Study size                   | 10      | Explain how the study size was arrived at                                                                                                                                                                                                                                                                                                                                                                     |               |
| Quantitative variables       | 11      | Explain how quantitative variables were handled in the analyses. If applicable, describe which groupings were chosen and why                                                                                                                                                                                                                                                                                  | p. 7–8        |
| Statistical methods          | 12      | (a) Describe all statistical methods, including those used to control for confounding<br>(b) Describe any methods used to examine subgroups and interactions<br>(c) Explain how missing data were addressed<br>(d) If applicable, explain how loss to follow-up was addressed<br>(e) Describe any sensitivity analyses                                                                                        | p. 7–8        |
| <b>Results</b>               |         |                                                                                                                                                                                                                                                                                                                                                                                                               |               |
| Participants                 | 13*     | (a) Report numbers of individuals at each stage of study—eg numbers potentially eligible, examined for eligibility, confirmed eligible, included in the study, completing follow-up, and analysed<br>(b) Give reasons for non-participation at each stage<br>(c) Consider use of a flow diagram                                                                                                               | p. 8–9        |
| Descriptive data             | 14*     | (a) Give characteristics of study participants (eg demographic, clinical, social) and information on exposures and potential confounders<br>(b) Indicate number of participants with missing data for each variable of interest<br>(c) Summarise follow-up time (eg, average and total amount)                                                                                                                | p. 8–9        |
| Outcome data                 | 15*     | Report numbers of outcome events or summary measures over time                                                                                                                                                                                                                                                                                                                                                | p. 9          |
| Main results                 | 16      | (a) Give unadjusted estimates and, if applicable, confounder-adjusted estimates and their precision (eg, 95% confidence interval). Make clear which confounders were adjusted for and why they were included<br>(b) Report category boundaries when continuous variables were categorized<br>(c) If relevant, consider translating estimates of relative risk into absolute risk for a meaningful time period | p. 9–10       |

|    |                          |    |                                                                                                                                                                            |          |
|----|--------------------------|----|----------------------------------------------------------------------------------------------------------------------------------------------------------------------------|----------|
| 1  | Other analyses           | 17 | Report other analyses done—eg analyses of subgroups and interactions, and sensitivity analyses                                                                             | p. 10    |
| 2  |                          |    |                                                                                                                                                                            |          |
| 3  |                          |    |                                                                                                                                                                            |          |
| 4  | <b>Discussion</b>        |    |                                                                                                                                                                            |          |
| 5  | Key results              | 18 | Summarise key results with reference to study objectives                                                                                                                   | p. 10–11 |
| 6  | Limitations              | 19 | Discuss limitations of the study, taking into account sources of potential bias or imprecision. Discuss both direction and magnitude of any potential bias                 | p. 12    |
| 7  |                          |    |                                                                                                                                                                            |          |
| 8  | Interpretation           | 20 | Give a cautious overall interpretation of results considering objectives, limitations, multiplicity of analyses, results from similar studies, and other relevant evidence | p. 12    |
| 9  |                          |    |                                                                                                                                                                            |          |
| 10 | Generalisability         | 21 | Discuss the generalisability (external validity) of the study results                                                                                                      | p. 12–13 |
| 11 |                          |    |                                                                                                                                                                            |          |
| 12 | <b>Other information</b> |    |                                                                                                                                                                            |          |
| 13 | Funding                  | 22 | Give the source of funding and the role of the funders for the present study and, if applicable, for the original study on which the present article is based              | p. 15    |
| 14 |                          |    |                                                                                                                                                                            |          |
| 15 |                          |    |                                                                                                                                                                            |          |
| 16 |                          |    |                                                                                                                                                                            |          |

\*Give information separately for exposed and unexposed groups.

**Note:** An Explanation and Elaboration article discusses each checklist item and gives methodological background and published examples of transparent reporting. The STROBE checklist is best used in conjunction with this article (freely available on the Web sites of PLoS Medicine at <http://www.plosmedicine.org/>, Annals of Internal Medicine at <http://www.annals.org/>, and Epidemiology at <http://www.epidem.com/>). Information on the STROBE Initiative is available at <http://www.strobe-statement.org>.

# BMJ Open

## Hospital-based cohort study to determine the association between home-time and disability after stroke by age, sex, stroke type, and study year in Canada

|                                 |                                                                                                                                                                                                                                                                                                                                                                                 |
|---------------------------------|---------------------------------------------------------------------------------------------------------------------------------------------------------------------------------------------------------------------------------------------------------------------------------------------------------------------------------------------------------------------------------|
| Journal:                        | <i>BMJ Open</i>                                                                                                                                                                                                                                                                                                                                                                 |
| Manuscript ID                   | bmjopen-2019-031379.R1                                                                                                                                                                                                                                                                                                                                                          |
| Article Type:                   | Original research                                                                                                                                                                                                                                                                                                                                                               |
| Date Submitted by the Author:   | 01-Oct-2019                                                                                                                                                                                                                                                                                                                                                                     |
| Complete List of Authors:       | Yu, Amy Ying Xin; University of Toronto, Medicine (Neurology)<br>Fang, Jiming; Institute for Clinical Evaluative Sciences<br>Porter, Joan; Institute for Clinical Evaluative Sciences<br>Austin, Peter; Institute for Clinical Evaluative Sciences<br>Smith, Eric E.; University of Calgary, Hotchkiss Brain Institute<br>Kapral, MK; University of Toronto Faculty of Medicine |
| <b>Primary Subject Heading</b>: | Neurology                                                                                                                                                                                                                                                                                                                                                                       |
| Secondary Subject Heading:      | Health services research, Epidemiology                                                                                                                                                                                                                                                                                                                                          |
| Keywords:                       | Stroke < NEUROLOGY, Organisation of health services < HEALTH SERVICES ADMINISTRATION & MANAGEMENT, EPIDEMIOLOGY                                                                                                                                                                                                                                                                 |
|                                 |                                                                                                                                                                                                                                                                                                                                                                                 |

SCHOLARONE™  
Manuscripts

Confidential – Yu, AYX

1  
2  
3 Title: Hospital-based cohort study to determine the association between home-time and disability  
4 after stroke by age, sex, stroke type, and study year in Canada  
5  
6  
7  
8  
9

10 Authors: Amy Y X Yu MD MSc<sup>1,2</sup>, Jiming Fang PhD<sup>2</sup>, Joan Porter MSc<sup>2</sup>, Peter C Austin PhD<sup>2</sup>,  
11  
12 Eric E Smith MD MPH<sup>3</sup>, Moira K Kapral MD MSc<sup>2,4</sup>  
13  
14  
15  
16

17 <sup>1</sup>Department of Medicine (Neurology), University of Toronto, Sunnybrook Health Sciences  
18 Centre, Toronto, Ontario, Canada, <sup>2</sup>ICES, Toronto, Ontario, Canada, <sup>3</sup>Department of Clinical  
19 Neurosciences and Hotchkiss Brain Institute, University of Calgary, Calgary, Alberta, Canada,  
20  
21 <sup>4</sup>Department of Medicine (General Internal Medicine), University of Toronto-University Health  
22 Network, Toronto, Ontario, Canada.  
23  
24  
25  
26  
27  
28  
29  
30

31 **Correspondence to:** Dr. Amy Y. X. Yu, MD, FRCPC, Neurologist, Department of Medicine  
32 (Neurology), University of Toronto, Sunnybrook Health Sciences Centre, Office A-442, 2075  
33 Bayview Avenue, CANADA Phone: 1 (416) 480-4866, Fax: 1 (416) 480-5753,  
34  
35 [amyx.yu@utoronto.ca](mailto:amyx.yu@utoronto.ca) Twitter handle: @YuAmyyu  
36  
37  
38  
39  
40  
41

42 **Abstract word count:** 285 words  
43

44 **Article word count:** 2,529 words  
45

46 **References:** 27 references  
47

48 **Tables:** 2  
49

50 **Figures:** 3  
51  
52  
53  
54  
55  
56  
57  
58  
59  
60



Confidential – Yu, AYX

## Abstract

**Objective:** Home-time is an emerging patient-centered stroke outcome metric, but it is not well described in the population. We aimed to determine the association between 90-day home-time and global disability after stroke. We hypothesized that longer home-time would be associated with less disability.

**Design:** Hospital-based cohort study of patients with ischemic stroke or intracerebral hemorrhage admitted to an acute care hospital between April 1st 2002 and March 31st 2013.

**Setting:** All regional stroke centres and a simple random sample of patients from all other hospitals across the province of Ontario, Canada.

**Participants:** We included 39,417 adult patients (84% ischemic, 16% hemorrhage), 53% male, with a median age of 74 years. We excluded non-residents of Ontario, patients without a valid health insurance number, patients discharged against medical advice or those who failed to return from a pass, patients living in a long-term care centre at baseline, and stroke events occurring in-hospital.

**Primary outcome measure:** Association between 90-day home-time, defined as the number of days spent at home in the first 90 days after stroke, obtained using linked administrative data, and modified Rankin Scale score at discharge.

**Results:** Compared to people with no disability, those with minimal disability had less home-time (adjusted rate ratio (aRR) 0.96, 95% confidence intervals (CI<sub>95</sub>) [0.93,0.98]) and those with the most severe disability had the least home-time (aRR 0.05 CI<sub>95</sub> [0.04,0.05]). We found no clinically relevant modification by stroke type, sex, or study year. However, for a given level of disability, older patients experienced less home-time compared to younger patients.

Confidential – Yu, AYX

1  
2  
3 **Conclusions:** Our results provide content validity for home-time to be used to monitor stroke  
4  
5 outcomes in large populations or to study temporal trends. Older patients experience less home-  
6  
7 time for a given level of disability, suggesting the need for stratification by age.  
8  
9

### 10 11 12 **Strengths and limitations of this study**

- 14 • Hospital-based analysis of home-time, a graded stroke outcome metric that can be  
15 derived from administrative data.
- 16  
17 • First study to assess the association between home-time and global disability in  
18 subgroups, including stroke type, sex, age groups, and study year.
- 19  
20 • Lack of data on disability after hospital discharge.
- 21  
22 • Lack of data on social support or private funds, which may influence ability to return  
23 home.  
24  
25  
26  
27  
28  
29  
30  
31  
32  
33  
34  
35  
36  
37  
38  
39  
40  
41  
42  
43  
44  
45  
46  
47  
48  
49  
50  
51  
52  
53  
54  
55  
56  
57  
58  
59  
60

Confidential – Yu, AYX

## Introduction

Stroke is a leading cause of severe disability.<sup>1 2</sup> The lack of a routinely collected graded stroke outcome metric is a critical limitation to population-based stroke outcome research. The modified Rankin Scale (mRS) is the most frequently used measure of functional outcome in stroke clinical research, but it cannot be routinely obtained for all patients as it requires prospective patient follow-up and testing.<sup>3</sup> Home-time is a novel stroke outcome indicator that is correlated with the mRS when assessed in clinical trial populations with ischemic stroke.<sup>4-6</sup> Home-time is defined as the total number of days a patient is living outside of a healthcare institution after stroke. This metric is patient-centered<sup>7 8</sup> and is ideal for pragmatic studies evaluating real-world outcomes because it can be derived for large populations using administrative data.<sup>5 6</sup>

There are nevertheless several gaps in knowledge about home-time. Prior studies focused on patients with ischemic strokes enrolled in clinical trials<sup>4 9</sup> and few have described the relationship between home-time and mRS in the general population.<sup>5</sup> Understanding whether the association between home-time and mRS holds true in a population-based sample, in different stroke types, in important patient subgroups, as well as in different time periods is necessary to inform whether home-time can be used as an outcome metric to evaluate quality of stroke care. Finally, because home-time may be sensitive to the structures of healthcare systems, it is relevant to validate this metric in different jurisdictions.<sup>10</sup>

We aimed to determine the association between 90-day home-time and disability at discharge, measured using the mRS score, in a hospital-based cohort of patients with ischemic or

Confidential – Yu, AYX

1  
2  
3 hemorrhagic stroke. We hypothesized that home-time would be strongly associated with the  
4  
5 mRS score and that this association would not be significantly modified by stroke type, temporal  
6  
7 trends, or patient demographics.  
8  
9

## 11 12 **Methods**

### 13 14 Cohort identification

15  
16 We identified all hospital admissions for ischemic stroke or intracerebral hemorrhage in the  
17  
18 Ontario Stroke Registry (formerly known as the Registry of the Canadian Stroke Network)  
19  
20 between April 1st 2002 and March 31st 2013. The registry collected data on all consecutive  
21  
22 patients with stroke seen in the emergency department or admitted to regional stroke centres and  
23  
24 a simple random sample of patients from all other hospitals across Ontario, Canada's most  
25  
26 populous province with a population of 13 million people.<sup>11</sup> We excluded patients with  
27  
28 subarachnoid hemorrhage. Other exclusion criteria were patients aged less than 18 years, non-  
29  
30 residents of Ontario or those without a valid health insurance number, patients discharged against  
31  
32 medical advice or those who failed to return from a pass, patients living in a long-term care  
33  
34 centre at baseline, and any strokes occurring during hospitalization for a different health  
35  
36 condition. Only the first presentation was included in individuals who presented with stroke  
37  
38 more than once during the study period.  
39  
40  
41  
42  
43  
44  
45  
46

### 47 Outcomes and covariates

48  
49 The 90-day home-time was the primary outcome and was defined as the total number of days a  
50  
51 patient was living outside of a healthcare institution in the first 90 days after stroke. Home-time  
52  
53 was calculated for each individual patient using linked administrative health databases  
54  
55  
56  
57

Confidential – Yu, AYX

1  
2  
3 (Supplemental Table 1) by subtracting the number of days spent in emergency care, acute care,  
4 inpatient rehabilitation, long-term care institution, as well as any re-hospitalizations from the first  
5 90 days after the date of admission for the index event. By definition, patients who died during  
6 the index hospitalization have 0 home-time days. Patients who were discharged from health care  
7 institutions and subsequently died in the first 90 days after stroke may have accumulated home-  
8 time days. We also determined whether Ontario public home care services were provided to  
9 patients who were assumed to be at home. Canadian administrative databases include data on the  
10 entire population and have been extensively validated for research purposes.<sup>12</sup> These datasets  
11 were linked using unique encoded identifiers and analyzed at ICES.<sup>13</sup>  
12  
13  
14  
15  
16  
17  
18  
19  
20  
21  
22  
23  
24  
25

26 Data on discharge mRS were collected in the registry through retrospective chart abstraction by  
27 trained chart abstractors, mainly nurses, with stroke expertise (<1% missing data). The mRS is  
28 an ordinal scale ranging from 0 for no symptoms, to 3 for moderate disability (able to walk  
29 without assistance, but requiring some help), to 5 for severe disability (bedridden, requiring  
30 constant nursing care), and to 6 for death.<sup>3</sup> Data validation by duplicate chart abstraction showed  
31 excellent agreement (kappa score or intraclass correlation coefficient of greater than 0.9) for key  
32 variables.<sup>14</sup>  
33  
34  
35  
36  
37  
38  
39  
40  
41  
42  
43  
44

45 The covariates in our analyses were age, sex, stroke type (ischemic stroke versus intracerebral  
46 hemorrhage), stroke severity (mild stroke defined as a National Institutes of Health Stroke Scale  
47 (NIHSS) < 5), Charlson comorbidity index (dichotomized to <2 or ≥ 2), independence in  
48 activities of daily living prior to the index stroke, location of residency (small population centre:  
49 less than 10,000, medium population centre: 10,000 to 100,000, and large urban population  
50  
51  
52  
53  
54  
55  
56  
57  
58  
59  
60

Confidential – Yu, AYX

1  
2  
3 centre: >100,000), and neighborhood income quintile. The covariates were obtained from the  
4  
5 Ontario Stroke Registry, except for the Charlson comorbidity index, the location of residency,  
6  
7 and the neighborhood income quintile which were obtained from linked administrative data.<sup>15</sup>  
8  
9

## 10 11 12 Statistical methods

13  
14 Patient characteristics were described using proportions for categorical variables, mean and  
15  
16 standard deviation (SD), and median with 25<sup>th</sup> and 75<sup>th</sup> percentiles (Q<sub>1</sub>,Q<sub>3</sub>) for continuous  
17  
18 variables. We used Spearman's rank correlation to quantify the correlation between 90-day  
19  
20 home-time and discharge mRS stratified by stroke type. Because the distribution of home-time is  
21  
22 bucket-shaped with peaks around its minimum value (0) and maximum value (90), we  
23  
24 considered four regression models: the negative binomial model, the Poisson model, and their  
25  
26 respective zero-inflated counterparts.<sup>16</sup> The zero-inflated negative binomial regression model  
27  
28 best fit our observed data. Accordingly, this model was used to determine the association  
29  
30 between discharge mRS and 90-day home-time with adjustment for the covariates. The zero-  
31  
32 inflated negative binomial model yields two sets of regression coefficients: one from an  
33  
34 underlying logistic model that is modeling excess zeros and one from an underlying negative  
35  
36 binomial model for counts. To simplify presentation and interpretation of the two sets of  
37  
38 regression coefficients, we used a previously described method for summarizing the effect of the  
39  
40 predictor variables to yield an adjusted summary rate ratio (aRR), which is interpreted as the  
41  
42 ratio of the mean number of home-time days among those exposed to the covariate of interest to  
43  
44 the mean number of home-time days among those who were not.<sup>16</sup> We used bootstrapping to  
45  
46 obtain 95% confidence intervals (CI<sub>95</sub>). In order to determine whether the association between  
47  
48 home-time and mRS was significantly modified by stroke type, sex, age, and study year, we used  
49  
50  
51  
52  
53  
54  
55  
56  
57  
58  
59  
60

Confidential – Yu, AYX

1  
2  
3 likelihood ratio tests to compare the models with and without the appropriate multiplicative  
4  
5 interaction terms. If a statistically significant interaction was present (defined as  $p < 0.05$ ), we  
6  
7 reported the stratum-specific aRR derived from the model with the appropriate main effects and  
8  
9 interaction terms.  
10

### 11 12 13 14 15 Research Ethics Approval

16  
17 ICES is an independent, non-profit research institute whose legal status under Ontario's health  
18  
19 information privacy law allows it to collect and analyze health care and demographic data,  
20  
21 without consent, for health system evaluation and improvement. The use of data in this project  
22  
23 was authorized under section 45 of Ontario's Personal Health Information Protection Act. We  
24  
25 have permission to access the data.  
26  
27  
28  
29

### 30 31 Results

32  
33 Our study sample consisted of 39,417 patients (84% ischemic stroke and 16% intracerebral  
34  
35 hemorrhage), with a median ( $Q_1, Q_3$ ) age of 74 years (63,82), of whom 53% were male. The  
36  
37 median in-hospital length of stay was 9 days (5,18). Table 1 describes patient characteristics,  
38  
39 disability at discharge, the median 90-day home-time, and the location of the patient at 90 days  
40  
41 by stroke type. The median 90-day home-time was 55 days (0,82) for patients with ischemic  
42  
43 stroke and 0 (0,58) for those with intracerebral hemorrhage. By definition, patients who died  
44  
45 during the index hospitalization ( $n=6,052$ , 15%) did not accumulate any home-time days.  
46  
47  
48  
49

50  
51 More 90-day home-time (i.e. more days at home) was associated with lower mRS at discharge  
52  
53 (i.e. less disability) for ischemic stroke (Spearman correlation coefficient -0.78) and intracerebral  
54  
55  
56  
57

Confidential – Yu, AYX

1  
2  
3 hemorrhage (Spearman correlation coefficient -0.80). Table 2 shows the median ( $Q_1$ ,  $Q_3$ ) and  
4  
5 mean (standard deviation) home-time for each mRS category as well as the results of the  
6  
7 multivariable zero-inflated negative binomial analyses.  
8  
9

10  
11  
12 We showed that people with higher disability at discharge from the acute-care hospitalization  
13  
14 experienced less home-time. Compared to people discharged with no disability (mRS=0), those  
15  
16 discharged with minimal disability had slightly less home-time (mRS=1 aRR 0.96, CI<sub>95</sub>  
17  
18 [0.93,0.98]), but those discharged with the most severe disability had the least home-time  
19  
20 (mRS=5 aRR 0.05 CI<sub>95</sub> [0.04,0.05]). In addition, older people, those with a higher comorbidity  
21  
22 burden, and those with higher stroke severity experienced less home-time; while those who were  
23  
24 independent at baseline experienced more home-time (Table 2). Patients living in medium urban  
25  
26 regions had slightly more home-time than those living in small towns or in large urban regions.  
27  
28 Home-time was not associated with the neighborhood income quintile, a proxy for  
29  
30 socioeconomic status.<sup>15</sup>  
31  
32  
33  
34  
35  
36  
37

38 Figure 1 shows the relationship between discharge mRS and 90-day home-time by stroke type,  
39  
40 age, sex, and study year. There was no evidence of effect modification by stroke type (p for  
41  
42 interaction=0.06), but there was a statistically significant interaction for age, sex, and study year  
43  
44 (p for interaction < 0.001 for all three covariates). In the sub-analysis by age, we observed that  
45  
46 for almost all levels of the mRS, except those with the most severe disability, older patients  
47  
48 experienced less home-time compared to their younger counterparts (Figure 2). In the sub-  
49  
50 analysis by sex, we observed that compared to women, men experienced slightly more home-  
51  
52 time in the subgroup of patients discharged with lower disability (mRS=1 aRR CI<sub>95</sub> 1.02  
53  
54  
55  
56  
57  
58  
59  
60



Confidential – Yu, AYX

1  
2  
3 [1.00,1.05], mRS=2 aRR CI<sub>95</sub> 1.03 [1.00,1.05], and mRS=3 aRR CI<sub>95</sub> 1.05 [1.03,1.07]), but men  
4  
5 had less home-time among those with the most severe disability (mRS=5 aRR CI<sub>95</sub> 0.69  
6  
7 [0.52,0.92], Figure 3). Finally, in the sub-analysis by study years, despite a statistically  
8  
9 significant p-value for interaction, we did not observe any consistent or clinically meaningful  
10  
11 trends in effect modification (Supplemental Figure 1).  
12  
13  
14  
15  
16

## 17 Discussion

18  
19  
20 In this large hospital-based study of patients with stroke, we demonstrated that 90-day home-  
21  
22 time was associated with global disability as measured by the mRS at discharge, for both  
23  
24 ischemic stroke and intracerebral hemorrhage, and that this association was stable over an 11-  
25  
26 year period. We showed a clear gradient between home-time and functional outcomes, across the  
27  
28 levels of disability measured by the mRS, with people discharged from hospital with the highest  
29  
30 disability experiencing the least home-time. In addition, home-time was responsive to covariates  
31  
32 known to be associated with stroke outcomes as people who were older, dependent at baseline,  
33  
34 had higher comorbidity burden, or presented with severe strokes had less home-time.<sup>17 18</sup>  
35  
36  
37  
38  
39

40 Home-time has been identified as a patient-centered outcome in stroke<sup>7</sup> as well as in other  
41  
42 medical conditions, such as cancer.<sup>8</sup> This metric is associated with healthcare costs and is  
43  
44 important to policy-makers.<sup>10 19</sup> With the availability of new stroke treatments; for example,  
45  
46 acute revascularization treatments up to 24 hours after stroke onset,<sup>20-22</sup> systematic evaluation of  
47  
48 outcomes with a graded and patient-centered metric is urgently needed for monitoring the quality  
49  
50 and equity of care across populations. Our findings support the use of home-time derived from  
51  
52 administrative data to study real-world stroke outcomes as well as in pragmatic clinical trials.<sup>23</sup>  
53  
54  
55  
56  
57

Confidential – Yu, AYX

1  
2  
3  
4  
5 Our inclusion of patients with intracerebral hemorrhage is important because acute treatment  
6 options are limited for this condition and systematic evaluation of outcomes may be particularly  
7 relevant for testing potential treatments or identifying prognostic markers.<sup>24</sup> A recent study  
8 reported that discharge mRS is associated with 90-day home-time after admission for aneurysmal  
9 subarachnoid hemorrhage,<sup>25</sup> but the association between home-time and mRS has not yet been  
10 reported in patients with intracerebral hemorrhage. Further, the temporal stability of the  
11 relationship between home-time and mRS is important for studies on temporal trends in stroke  
12 outcomes. The sex differences in the relationship between home-time and mRS are of small  
13 magnitude, suggesting that home-time is a valid indicator for post-stroke disability in both men  
14 and women.  
15  
16  
17  
18  
19  
20  
21  
22  
23  
24  
25  
26  
27  
28  
29  
30

31 In the stratified analysis by age, we found that compared to younger patients, older ones with the  
32 same degree of disability at discharge experienced less home-time. For example, considering that  
33 the mean home-time for patients discharged with mild disability (mRS=1) was 77 days, an aRR  
34 of 0.96 for patients aged 71-80 years compared to those aged 21-60 years translates into a  
35 difference of 3 days and an aRR of 0.90 for those older than 80 years translates into a difference  
36 of 8 days. This gradient was not seen in patients with severe disability (mRS=5), likely because  
37 few home-time days were accumulated overall in this category. Older patients are likely  
38 experiencing less home-time compared to younger ones because of more comorbid medical  
39 illnesses, post-stroke complications, and higher pre-stroke dependence.<sup>17 18</sup> Stratified analyses by  
40 age groups may be necessary when using home-time to investigate outcomes after stroke.  
41  
42  
43  
44  
45  
46  
47  
48  
49  
50  
51  
52  
53  
54  
55  
56  
57  
58  
59  
60

Confidential – Yu, AYX

1  
2  
3 Our findings are consistent with other studies calibrating home-time with the mRS in patients  
4 with ischemic stroke enrolled in clinical trials<sup>4 6 9</sup> as well as in United States (U.S.) Medicare  
5 beneficiaries admitted to hospital with ischemic stroke.<sup>5 26</sup> Home-time is likely influenced by the  
6 organization of healthcare systems.<sup>6 10</sup> Although we were unable to perform direct comparisons,  
7 we found that the median home-time after ischemic stroke in Ontario (55 days [0,82]) was less  
8 than that reported in the U.S. (79 days [52,86]),<sup>5</sup> suggesting that home-time should be calibrated  
9 in the setting where it is intended to be used. A recent study using data from the Scottish  
10 National Health Service reported a mean home-time of 49 days after ischemic stroke and 27 days  
11 after intracerebral hemorrhage,<sup>27</sup> which is similar to our findings (46 days after ischemic stroke  
12 and 26 days after intracerebral hemorrhage). Both Canadian and Scottish health systems operate  
13 under a single-payer universal healthcare model. Understanding home-time in different health  
14 systems will inform the use of this metric as a pragmatic outcome in multinational studies.  
15  
16  
17  
18  
19  
20  
21  
22  
23  
24  
25  
26  
27  
28  
29  
30  
31  
32

33 The strengths of our study are its population-based design, the inclusion of patients with  
34 intracerebral hemorrhages, the large sample size, and the long study duration allowing for the  
35 evaluation of temporal trends. Our study nevertheless has limitations. First, the registry database  
36 only includes mRS at the time of discharge and the 90-day mRS was not available for analysis.  
37 While disability may change between discharge and 90 days, early disability has been shown to  
38 be a predictor of outcome at 90 days.<sup>28</sup> Further, we showed strong associations between home-  
39 time and discharge mRS in subgroup analyses, providing validity for the clinical relevance of  
40 home-time. Second, returning home may be contingent on social support or private funds, which  
41 are not captured in the administrative data calculation of home-time. We did however include  
42 neighborhood income quintile as a measure of socioeconomic status and did not find an  
43  
44  
45  
46  
47  
48  
49  
50  
51  
52  
53  
54  
55  
56  
57  
58  
59  
60

Confidential – Yu, AYX

1  
2  
3 association with home-time. We also included the use of publicly-funded home care services,  
4  
5 which may range from a few hours a week to a few hours a day for assistance with activities of  
6  
7 daily living or instrumental activities of daily living, but these do not include around the clock  
8  
9 support. Finally, admission to long-term care may be underestimated prior to the fiscal year  
10  
11 2009/2010 because the Continuing Care Reporting System Long-Term Care database was  
12  
13 incomplete<sup>29</sup>, but we did not find any clinically meaningful differences in the association  
14  
15 between mRS and home-time by study years.  
16  
17  
18  
19  
20

## 21 **Conclusions**

22  
23 Home-time is associated with global disability after ischemic stroke and intracerebral  
24  
25 hemorrhage. Its key advantage is that it can be calculated using routinely collected administrative  
26  
27 data, allowing for the measurement of stroke outcomes for large populations. Our findings  
28  
29 inform the application of home-time as a quality indicator of stroke care and its use as a  
30  
31 pragmatic outcome in stroke health services research.  
32  
33  
34  
35  
36  
37

## 38 **References**

- 39  
40 1. Krueger H, Koot J, Hall RE, et al. Prevalence of Individuals Experiencing the Effects of Stroke in Canada:  
41 Trends and Projections. *Stroke* 2015;46(8):2226-31. doi: 10.1161/strokeaha.115.009616  
42 [published Online First: 2015/07/25]  
43  
44 2. Heart and Stroke Foundation. Stroke Report 2016 2016 [Accessed March 2017,  
45 <http://www.strokebestpractices.ca/index.php/news-feature/stroke-report-16-just-released/>].  
46 Available from: [http://www.strokebestpractices.ca/index.php/news-feature/stroke-report-](http://www.strokebestpractices.ca/index.php/news-feature/stroke-report-2016-just-released/)  
47 [2016-just-released/](http://www.strokebestpractices.ca/index.php/news-feature/stroke-report-2016-just-released/) accessed March.  
48  
49 3. Quinn TJ, Dawson J, Walters MR, et al. Functional outcome measures in contemporary stroke trials.  
50 *Int J Stroke* 2009;4(3):200-5. doi: 10.1111/j.1747-4949.2009.00271.x [published Online First:  
51 2009/08/08]  
52  
53 4. Quinn TJ, Dawson J, Lees JS, et al. Time spent at home poststroke: "home-time" a meaningful and  
54 robust outcome measure for stroke trials. *Stroke; a journal of cerebral circulation*  
55 2008;39(1):231-33. doi: STROKEAHA.107.493320 [pii]

Confidential – Yu, AYX

- 1  
2  
3 5. Fonarow GC, Liang L, Thomas L, et al. Assessment of Home-Time After Acute Ischemic Stroke in  
4 Medicare Beneficiaries. *Stroke; a journal of cerebral circulation* 2016;47(3):836-42. doi:  
5 10.1161/STROKEAHA.115.011599 [doi]
- 6  
7 6. Yu AYX, Rogers E, Wang M, et al. Population-based study of home-time by stroke type and correlation  
8 with modified Rankin score. *Neurology* 2017;89(19):1970-76. doi:  
9 10.1212/wnl.0000000000004631 [published Online First: 2017/10/13]
- 10  
11 7. Xian Y, O'Brien EC, Fonarow GC, et al. Patient-Centered Research into Outcomes Stroke Patients  
12 Prefer and Effectiveness Research: Implementing the patient-driven research paradigm to aid  
13 decision making in stroke care. *American Heart Journal* 2015;170(1):36-45, 45.e1-11. doi:  
14 10.1016/j.ahj.2015.04.008 [doi]
- 15  
16 8. Groff AC, Colla CH, Lee TH. Days Spent at Home - A Patient-Centered Goal and Outcome. *N Engl J Med*  
17 2016;375(17):1610-12. doi: 10.1056/NEJMp1607206 [published Online First: 2016/10/27]
- 18  
19 9. Mishra NK, Shuaib A, Lyden P, et al. Home time is extended in patients with ischemic stroke who  
20 receive thrombolytic therapy: a validation study of home time as an outcome measure. *Stroke*  
21 2011;42(4):1046-50. doi: 10.1161/STROKEAHA.110.601302
- 22  
23 10. Barnett ML, Grabowski DC, Mehrotra A. Home-to-Home Time - Measuring What Matters to Patients  
24 and Payers. *N Engl J Med* 2017;377(1):4-6. doi: 10.1056/NEJMp1703423 [published Online First:  
25 2017/07/06]
- 26  
27 11. Institute for Clinical Evaluative Sciences (ICES). Ontario Stroke Registry 2017  
28 [<http://www.ices.on.ca/Research/Research-programs/Cardiovascular/Ontario-Stroke-Registry>  
29 Accessed August 27 2019]. Available from: [http://www.ices.on.ca/Research/Research-](http://www.ices.on.ca/Research/Research-programs/Cardiovascular/Ontario-Stroke-Registry)  
30 [programs/Cardiovascular/Ontario-Stroke-Registry](http://www.ices.on.ca/Research/Research-programs/Cardiovascular/Ontario-Stroke-Registry).
- 31  
32 12. Juurlink D, Preyra C, Croxford R, et al. Canadian Institute for Health Information Discharge Abstract  
33 Database: A Validation Study Toronto: ICES; 2006 [[https://www.ices.on.ca/publications/atlasses-](https://www.ices.on.ca/publications/atlasses-and-reports/2006/canadian-institute-for-health-information)  
34 [and-reports/2006/canadian-institute-for-health-information](https://www.ices.on.ca/publications/atlasses-and-reports/2006/canadian-institute-for-health-information) Published June 06. Accessed  
35 August 19.]. Available from: [https://www.ices.on.ca/publications/atlasses-and-](https://www.ices.on.ca/publications/atlasses-and-reports/2006/canadian-institute-for-health-information)  
36 [reports/2006/canadian-institute-for-health-information](https://www.ices.on.ca/publications/atlasses-and-reports/2006/canadian-institute-for-health-information).
- 37  
38 13. ICES. ICES Data, Discovery, Better Health [<https://www.ices.on.ca/> Accessed September 2019].
- 39  
40 14. Kapral MK, Hall R, Stampelcoski M, et al. Registry of the Canadian Stroke Network - Report on the  
41 2008/09 Ontario Stroke Audit Toronto: ICES; [[http://www.ices.on.ca/~media/Files/Atlases-](http://www.ices.on.ca/~media/Files/Atlases-Reports/2011/RCSN-08-09-Ontario-stroke-audit/Full%20report.ashx)  
42 [Reports/2011/RCSN-08-09-Ontario-stroke-audit/Full%20report.ashx](http://www.ices.on.ca/~media/Files/Atlases-Reports/2011/RCSN-08-09-Ontario-stroke-audit/Full%20report.ashx) Published March 11.  
43 Accessed August 19.]. Available from: [http://www.ices.on.ca/~media/Files/Atlases-](http://www.ices.on.ca/~media/Files/Atlases-Reports/2011/RCSN-08-09-Ontario-stroke-audit/Full%20report.ashx)  
44 [Reports/2011/RCSN-08-09-Ontario-stroke-audit/Full%20report.ashx](http://www.ices.on.ca/~media/Files/Atlases-Reports/2011/RCSN-08-09-Ontario-stroke-audit/Full%20report.ashx).
- 45  
46 15. Kapral MK, Fang J, Chan C, et al. Neighborhood income and stroke care and outcomes. *Neurology*  
47 2012;79(12):1200-7. doi: 10.1212/WNL.0b013e31826aac9b [published Online First: 2012/08/17]
- 48  
49 16. Weaver CG, Ravani P, Oliver MJ, et al. Analyzing hospitalization data: potential limitations of Poisson  
50 regression. *Nephrol Dial Transplant* 2015;30(8):1244-9. doi: 10.1093/ndt/gfv071 [published  
51 Online First: 2015/03/31]
- 52  
53 17. Smith EE, Shobha N, Dai D, et al. Risk score for in-hospital ischemic stroke mortality derived and  
54 validated within the Get With the Guidelines-Stroke Program. *Circulation* 2010;122(15):1496-  
55 504. doi: 10.1161/CIRCULATIONAHA.109.932822
- 56  
57 18. Rost NS, Bottle A, Lee JM, et al. Stroke Severity Is a Crucial Predictor of Outcome: An International  
58 Prospective Validation Study. *J Am Heart Assoc* 2016;5(1):e002433. doi:  
59 10.1161/jaha.115.002433 [published Online First: 2016/01/23]
- 60  
61 19. Andersen SK, Croxford R, Earle CC, et al. Days at Home in the Last 6 Months of Life: A Patient-  
62 Determined Quality Indicator for Cancer Care. *Journal of oncology practice* 2019;15(4):e308-e15.  
63 doi: 10.1200/jop.18.00338 [published Online First: 2019/03/09]

Confidential – Yu, AYX

20. Albers GW, Marks MP, Kemp S, et al. Thrombectomy for Stroke at 6 to 16 Hours with Selection by Perfusion Imaging. *N Engl J Med* 2018;378(8):708-18. doi: 10.1056/NEJMoa1713973 [published Online First: 2018/01/25]
21. Nogueira RG, Jadhav AP, Haussen DC, et al. Thrombectomy 6 to 24 Hours after Stroke with a Mismatch between Deficit and Infarct. *N Engl J Med* 2018;378(1):11-21. doi: 10.1056/NEJMoa1706442 [published Online First: 2017/11/14]
22. Thomalla G, Simonsen CZ, Boutitie F, et al. MRI-Guided Thrombolysis for Stroke with Unknown Time of Onset. *N Engl J Med* 2018;379(7):611-22. doi: 10.1056/NEJMoa1804355 [published Online First: 2018/05/17]
23. Li G, Sajobi TT, Menon BK, et al. Registry-based randomized controlled trials- what are the advantages, challenges, and areas for future research? *J Clin Epidemiol* 2016;80:16-24. doi: 10.1016/j.jclinepi.2016.08.003 [published Online First: 2016/10/22]
24. Cordonnier C, Demchuk A, Ziai W, et al. Intracerebral haemorrhage: current approaches to acute management. *Lancet* 2018;392(10154):1257-68. doi: 10.1016/s0140-6736(18)31878-6 [published Online First: 2018/10/16]
25. Stienen MN, Smoll NR, Fung C, et al. Home-Time as a Surrogate Marker for Functional Outcome After Aneurysmal Subarachnoid Hemorrhage. *Stroke* 2018;1. doi: 10.1161/strokeaha.118.022808
26. O'Brien EC, Xian Y, Xu H, et al. Hospital Variation in Home-Time After Acute Ischemic Stroke: Insights From the PROSPER Study (Patient-Centered Research Into Outcomes Stroke Patients Prefer and Effectiveness Research). *Stroke* 2016;47(10):2627-33. doi: 10.1161/STROKEAHA.116.013563
27. McDermid I, Barber M, Dennis M, et al. Home-Time Is a Feasible and Valid Stroke Outcome Measure in National Datasets. *Stroke* 2019;50(5):1282-85. doi: 10.1161/strokeaha.118.023916 [published Online First: 2019/03/22]
28. Ovbiagele B, Lyden PD, Saver JL. Disability status at 1 month is a reliable proxy for final ischemic stroke outcome. *Neurology* 2010;75(8):688-92. doi: 10.1212/WNL.0b013e3181eee426 [published Online First: 2010/08/25]
29. Validation of incident long-term care admissions in Ontario using administrative data (Oral Presentation). Canadian Association for Health Services and Policy Research Conference; May 24 2017; Toronto, Ontario.

**Acknowledgements:** This study was supported by ICES, which is funded by an annual grant from the Ontario Ministry of Health and Long-Term Care (MOHLTC). The opinions, results and conclusions reported in this paper are those of the authors and are independent from the funding sources. No endorsement by ICES or the Ontario MOHLTC is intended or should be inferred. Parts of this material are based on data and/or information compiled and provided by Canadian Institute for Health Information (CIHI). However, the analyses, conclusions, opinions and statements expressed in the material are those of the author(s), and not necessarily those of CIHI.

Confidential – Yu, AYX

1  
2  
3 **Funding statement:** This work was supported by the Canadian Institutes of Health Research  
4 Catalyst Grant number 385156. Drs. Austin and Kapral hold Mid-Career Investigator Awards  
5  
6 from the Heart & Stroke Foundation of Canada.  
7  
8  
9

10  
11  
12 **Competing interest statement:** Dr. Yu, Dr. Fang, Ms. Porter, Dr. Austin, Dr. Smith, and Dr.  
13 Kapral report no competing interests.  
14  
15  
16

17  
18  
19 **Contributorship statement:** Dr. Yu contributed to the study concept and design, interpretation  
20 of data, drafting and revision of the manuscript. Dr. Fang contributed to the acquisition, analysis  
21 and interpretation of the data, and revision of the manuscript. Ms. Porter contributed to the  
22 acquisition, analysis and interpretation of the data, and revision of the manuscript. Dr. Austin  
23 contributed to data analysis and interpretation and revision of the manuscript. Dr. Smith  
24 contributed to the study concept and design, interpretation of data, and revision of the  
25 manuscript. Dr. Kapral contributed to the study concept and design, acquisition and  
26 interpretation of data, and revision of the manuscript.  
27  
28  
29  
30  
31  
32  
33  
34  
35  
36  
37  
38  
39

40 **Data sharing statement:** The data from this study were anonymized prior to analysis and are  
41 held securely in coded form at ICES. While data sharing agreements prohibit ICES from making  
42 the dataset publicly available, access may be granted to those who meet pre-specified criteria for  
43 confidential access. Information on permissions to access the data can be found at  
44  
45  
46  
47  
48

49 <https://www.ices.on.ca/Research/Information-for-researchers>  
50  
51  
52  
53  
54  
55  
56  
57  
58  
59  
60

Confidential – Yu, AYX

1  
2  
3  
4  
5  
6  
7  
8  
9  
10  
11  
12  
13  
14  
15  
16  
17  
18  
19  
20  
21  
22  
23  
24  
25  
26  
27  
28  
29  
30  
31  
32  
33  
34  
35  
36  
37  
38  
39  
40  
41  
42  
43  
44  
45  
46  
47  
48  
49  
50  
51  
52  
53  
54  
55  
56  
57  
58  
59  
60

**Patient and Public Involvement:** Patients and the public were not involved in the design or the planning of the study

For peer review only



Confidential – Yu, AXX

Table 1 Patient baseline characteristics, disability at discharge, and 90-day location

|                                                                       | <b>All<br/>(n=39,417)</b> | <b>Ischemic stroke<br/>(n=32,982)</b> | <b>ICH<br/>(n=6,435)</b> |
|-----------------------------------------------------------------------|---------------------------|---------------------------------------|--------------------------|
| <b>Median age (Q<sub>1</sub>,Q<sub>3</sub>)</b>                       | 74 (63,82)                | 75 (64,83)                            | 71 (59,80)               |
| <b>Male sex</b>                                                       | 20,693 (52.5%)            | 17,201 (52.2%)                        | 3,492 (54.3%)            |
| <b>Median NIHSS (Q<sub>1</sub>,Q<sub>3</sub>)</b>                     | 5 (2,12)                  | 5 (2,11)                              | 9 (2,16)                 |
| <b>Minor stroke (NIHSS&lt;5)</b>                                      | 16,113 (40.9%)            | 14,205 (43.1%)                        | 1,908 (29.7%)            |
| <b>Home location</b>                                                  |                           |                                       |                          |
| Large urban                                                           | 31,238 (79.3%)            | 26,028 (78.9%)                        | 5,210 (81.0%)            |
| Medium population                                                     | 3,120 (7.9%)              | 2,627 (8.0%)                          | 493 (7.7%)               |
| Small population                                                      | 5,059 (12.8%)             | 4,327 (13.1%)                         | 732 (11.4%)              |
| <b>Neighborhood income quintile</b>                                   |                           |                                       |                          |
| Lowest                                                                | 9,161 (23.2%)             | 7,748 (23.5%)                         | 1,413 (22.0%)            |
| Next to lowest                                                        | 8,446 (21.4%)             | 7,069 (21.4%)                         | 1,377 (21.4%)            |
| Middle                                                                | 7,483 (19.0%)             | 6,217 (18.8%)                         | 1,266 (19.7%)            |
| Next to highest                                                       | 7,083 (18.0%)             | 5,897 (17.9%)                         | 1,186 (18.4%)            |
| Highest                                                               | 7,244 (18.4%)             | 6,051 (18.3%)                         | 1,193 (18.5%)            |
| <b>Baseline independence</b>                                          | 29,688 (75.3%)            | 24,691 (74.9%)                        | 4,997 (77.7%)            |
| <b>CCI ≥ 2</b>                                                        | 20,851 (52.9%)            | 17,775 (53.9%)                        | 3,076 (47.8%)            |
| <b>Diabetes</b>                                                       | 10,095 (25.6%)            | 8,869 (26.9%)                         | 1,226 (19.1%)            |
| <b>Hypertension</b>                                                   | 27,156 (68.9%)            | 23,136 (70.1%)                        | 4,020 (62.5%)            |
| <b>Dyslipidemia</b>                                                   | 15,160 (38.5%)            | 13,307 (40.3%)                        | 1,853 (28.8%)            |
| <b>Active smoking</b>                                                 | 7,174 (18.2%)             | 6,251 (19.0%)                         | 923 (14.3%)              |
| <b>Prior stroke</b>                                                   | 7,131 (18.1%)             | 6,231 (18.9%)                         | 900 (14.0%)              |
| <b>Atrial fibrillation</b>                                            | 7,150 (18.1%)             | 6,232 (18.9%)                         | 918 (14.3%)              |
| <b>Coronary artery disease</b>                                        | 9,168 (23.3%)             | 8,210 (24.9%)                         | 958 (14.9%)              |
| <b>Dementia</b>                                                       | 2,780 (7.1%)              | 2,342 (7.1%)                          | 438 (6.8%)               |
| <b>Median acute care length of stay (Q<sub>1</sub>,Q<sub>3</sub>)</b> | 9 (5,18)                  | 9 (5,17)                              | 10 (4,24)                |
| <b>Discharge mRS</b>                                                  |                           |                                       |                          |
| Median mRS (Q <sub>1</sub> ,Q <sub>3</sub> )                          | 3 (2,4)                   | 3 (2,4)                               | 4 (3,6)                  |
| mRS = 0                                                               | 2,513 (6.4%)              | 2,263 (6.8%)                          | 250 (3.9%)               |
| mRS = 1                                                               | 4,495 (11.4%)             | 4,073 (12.3%)                         | 422 (6.6%)               |
| mRS = 2                                                               | 6,429 (16.3%)             | 5,896 (17.9%)                         | 533 (8.3%)               |
| mRS = 3                                                               | 8,413 (21.3%)             | 7,423 (22.5%)                         | 990 (15.4%)              |
| mRS = 4                                                               | 9,372 (23.8%)             | 7,772 (23.6%)                         | 1,600 (24.9%)            |
| mRS = 5                                                               | 2,143 (5.4%)              | 1,609 (4.9%)                          | 534 (8.3%)               |
| mRS = 6                                                               | 6,052 (15.4%)             | 3,946 (12.0%)                         | 2,106 (32.7%)            |
| <b>Median 90-day home-time (Q<sub>1</sub>,Q<sub>3</sub>)</b>          | 47 (0,81)                 | 55 (0,82)                             | 0 (0,58)                 |
| <b>Mean 90-day home-time (SD)</b>                                     | 42 (36)                   | 46 (36)                               | 26 (34)                  |
| <b>90-day location</b>                                                |                           |                                       |                          |
| Acute care                                                            | 1,686 (4.3%)              | 1,367 (4.1%)                          | 319 (5.0%)               |
| Rehabilitation                                                        | 1,816 (4.6%)              | 1,412 (4.3%)                          | 404 (6.3%)               |
| LTC/CCC                                                               | 2,910 (7.4%)              | 2,408 (7.3%)                          | 502 (7.8%)               |

Confidential – Yu, AYX

|                        |                |                |               |
|------------------------|----------------|----------------|---------------|
| Death                  | 8,083 (20.5%)  | 5,628 (17.1%)  | 2,455 (38.2%) |
| Home with home-care    | 2,140 (5.4%)   | 1,913 (5.8%)   | 227 (3.5%)    |
| Home without home-care | 22,782 (57.8%) | 20,254 (61.4%) | 2,528 (39.3%) |

Q<sub>1</sub>, Q<sub>3</sub>: 25<sup>th</sup> and 75<sup>th</sup> percentile, SD: standard deviation, ICH: intracerebral hemorrhage, NIHSS:

National Institutes of Health Stroke Scale, CCI: Charlson comorbidity index, mRS: modified

Rankin Scale (0-no symptoms, 1-no significant disability despite symptoms, 2- slight disability,

3-moderate disability, 4-moderately severe disability, 5-severe disability, 6-dead), LTC/CCC:

long-term care/complex continuing care

Confidential – Yu, AYX

Table 2 Adjusted summary rate ratio of home-time by predictor variables using multivariable zero-inflated negative binomial model

| Predictor variables                 | Median home-time (Q <sub>1</sub> ,Q <sub>3</sub> ) | Mean home-time (SD) | aRR [CI <sub>95</sub> ] |
|-------------------------------------|----------------------------------------------------|---------------------|-------------------------|
| <b>Age categories</b>               |                                                    |                     |                         |
| 21-60 years                         | 68 (12,84)                                         | 53 (35)             | Reference               |
| 61-70 years                         | 60 (0,83)                                          | 48 (36)             | 0.97 [0.95,0.99]        |
| 71-80 years                         | 46 (0,80)                                          | 42 (36)             | 0.94 [0.92,0.95]        |
| ≥ 80 years                          | 12 (0,71)                                          | 32 (35)             | 0.89 [0.87,0.91]        |
| <b>Sex</b>                          |                                                    |                     |                         |
| Female                              | 40 (0,79)                                          | 40 (36)             | Reference               |
| Male                                | 53 (0,82)                                          | 45 (36)             | 1.01 [0.99,1.02]        |
| <b>mRS category</b>                 |                                                    |                     |                         |
| mRS 0                               | 84 (81,87)                                         | 80 (16)             | Reference               |
| mRS 1                               | 84 (79,86)                                         | 77 (19)             | 0.96 [0.93,0.98]        |
| mRS 2                               | 81 (68,85)                                         | 73 (21)             | 0.92 [0.90,0.94]        |
| mRS 3                               | 57 (29,76)                                         | 50 (29)             | 0.60 [0.59,0.62]        |
| mRS 4                               | 9 (0,45)                                           | 23 (27)             | 0.23 [0.22,0.24]        |
| mRS 5                               | 0 (0,3)                                            | 7 (17)              | 0.05 [0.04,0.06]        |
| <b>Home location</b>                |                                                    |                     |                         |
| Large urban                         | 46 (0,81)                                          | 42 (36)             | Reference               |
| Medium population                   | 50 (0,82)                                          | 43 (37)             | 1.04 [1.02,1.07]        |
| Small population                    | 53 (0,82)                                          | 44 (37)             | 1.02 [1.00,1.04]        |
| <b>Neighborhood income quintile</b> |                                                    |                     |                         |
| Lowest                              | 43 (0,80)                                          | 41 (36)             | Reference               |
| Next to lowest                      | 46 (0,81)                                          | 42 (36)             | 1.02 [0.99,1.04]        |
| Middle                              | 49 (0,81)                                          | 43 (36)             | 1.02 [1.00,1.04]        |
| Next to highest                     | 50 (0,81)                                          | 43 (36)             | 1.02 [0.99,1.04]        |
| Highest                             | 50 (0,82)                                          | 43 (36)             | 1.02 [1.00,1.05]        |
| <b>Charlson comorbidity index</b>   |                                                    |                     |                         |
| Score < 2                           | 62 (0,83)                                          | 49 (36)             | Reference               |
| Score ≥ 2                           | 30 (0,76)                                          | 36 (36)             | 0.91 [0.90,0.93]        |
| <b>Pre-admission dependence</b>     |                                                    |                     |                         |
| Dependent                           | 7 (0,68)                                           | 30 (35)             | Reference               |
| Independent                         | 56 (0,82)                                          | 46 (36)             | 1.06 [1.04,1.08]        |
| <b>Stroke severity</b>              |                                                    |                     |                         |
| Mild (NIHSS < 5)                    | 78 (46,85)                                         | 62 (30)             | Reference               |
| Severe (NIHSS ≥ 5)                  | 5 (0,63)                                           | 29 (34)             | 0.82 [0.80,0.83]        |

Confidential – Yu, AYX

1  
2  
3  
4  
5  
6  
7  
8  
9  
10  
11  
12  
13  
14  
15  
16  
17  
18  
19  
20  
21  
22  
23  
24  
25  
26  
27  
28  
29  
30  
31  
32  
33  
34  
35  
36  
37  
38  
39  
40  
41  
42  
43  
44  
45  
46  
47  
48  
49  
50  
51  
52  
53  
54  
55  
56  
57  
58  
59  
60

Q<sub>1</sub>,Q<sub>3</sub>: First and third quartile, SD: standard deviation, aRR: adjusted summary rate ratio, CI<sub>95</sub>:  
95% confidence intervals, NIHSS: National Institutes of Health Stroke Scale

For peer review only

Confidential – Yu, AYX

1  
2  
3 Figure 1 Box plots of home-time by mRS stratified by stroke type (A), age (B), sex (C), and  
4  
5 study years (D)  
6  
7  
8  
9

10 Figure 2 Age-specific adjusted summary rate ratio for 90-day home-time by mRS with ages 21-  
11  
12 60 years as the reference group  
13  
14  
15

16  
17 Figure 3 Sex-specific adjusted summary rate ratio for 90-day home-time by mRS with female as  
18  
19 the reference group  
20  
21  
22  
23  
24  
25  
26  
27  
28  
29  
30  
31  
32  
33  
34  
35  
36  
37  
38  
39  
40  
41  
42  
43  
44  
45  
46  
47  
48  
49  
50  
51  
52  
53  
54  
55  
56  
57  
58  
59  
60

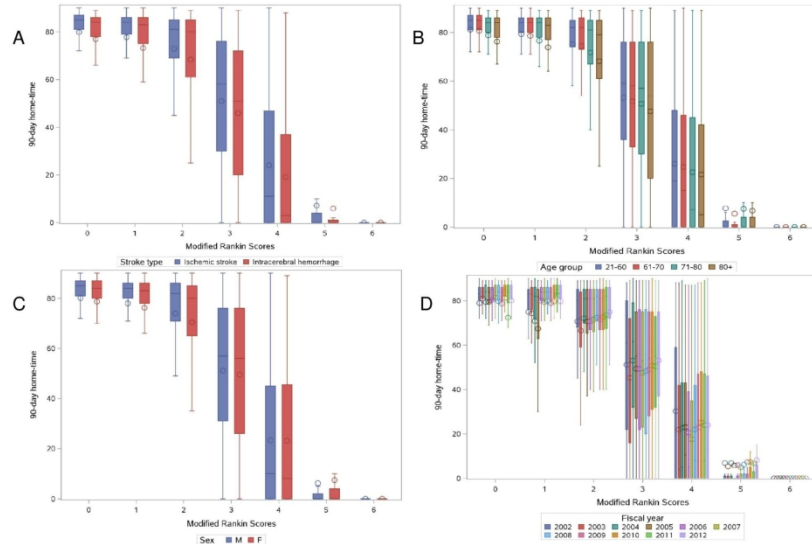

Figure 1 Box plots of home-time by mRS stratified by stroke type (A), age (B), sex (C), and study years (D)

279x215mm (300 x 300 DPI)

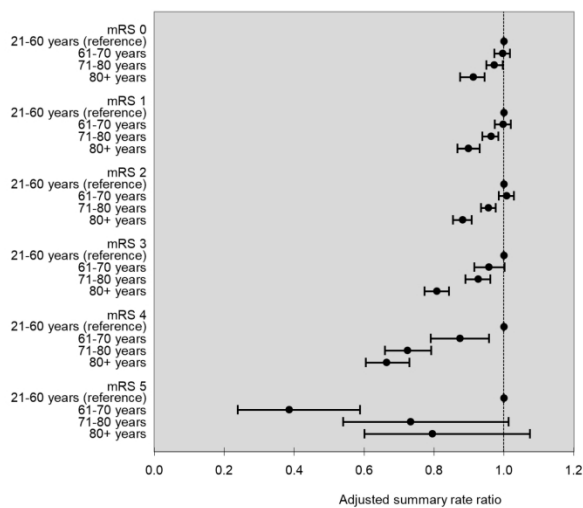

Figure 2 Age-specific adjusted summary rate ratio for 90-day home-time by mRS with ages 21-60 years as the reference group

215x279mm (300 x 300 DPI)

1  
2  
3  
4  
5  
6  
7  
8  
9  
10  
11  
12  
13  
14  
15  
16  
17  
18  
19  
20  
21  
22  
23  
24  
25  
26  
27  
28  
29  
30  
31  
32  
33  
34  
35  
36  
37  
38  
39  
40  
41  
42  
43  
44  
45  
46  
47  
48  
49  
50  
51  
52  
53  
54  
55  
56  
57  
58  
59  
60

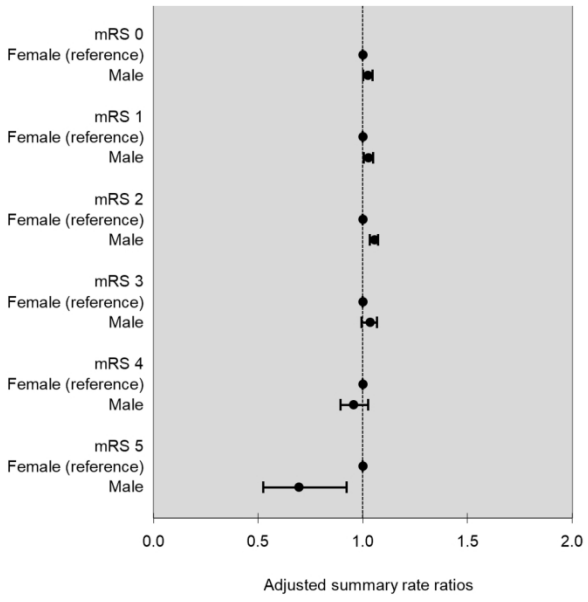

Figure 3 Sex-specific adjusted summary rate ratio for 90-day home-time by mRS with female as the reference group

215x279mm (300 x 300 DPI)



Supplemental Table 1 Administrative data sources

| Database              | Full database name                              | Description                        |
|-----------------------|-------------------------------------------------|------------------------------------|
| DAD                   | Discharge Abstract Database                     | Inpatient hospitalization data     |
| NACRS                 | National Ambulatory Care Reporting System       | Emergency department data          |
| NRS                   | National Rehabilitation Reporting System        | Rehabilitation data                |
| CCRS                  | Continuing Care Reporting System                | Complex continuing care            |
| CCRS-LTC <sup>a</sup> | Continuing Care Reporting System Long-Term Care | Long-term care data                |
| HCD                   | Ontario home care database                      | Home-care data                     |
| OHIP                  | Ontario Health Insurance Plan                   | Outpatient physician billings data |
| ODBP                  | Ontario Drug Benefit Program                    | Pharmacy data                      |
| RPDB                  | Ontario Registered Persons Database             | Mortality data                     |
| OSR                   | Ontario Stroke Registry                         | Disease-specific registry          |

<sup>a</sup>CCRS-LTC was incomplete prior to the 2009/2010 fiscal year. To identify patients admitted to long-term care prior to 2009/2010, we used a validated algorithm with 2 ODB records or 2 OHIP records or 1 ODB and 1 OHIP record within 30 days of each other with a long-term code flag. The date of admission to long-term care was defined as the date of the first record.

Supplemental Figure 1 Study year-specific adjusted summary rate ratio for 90-day home-time by mRS with year 2007 as the reference group

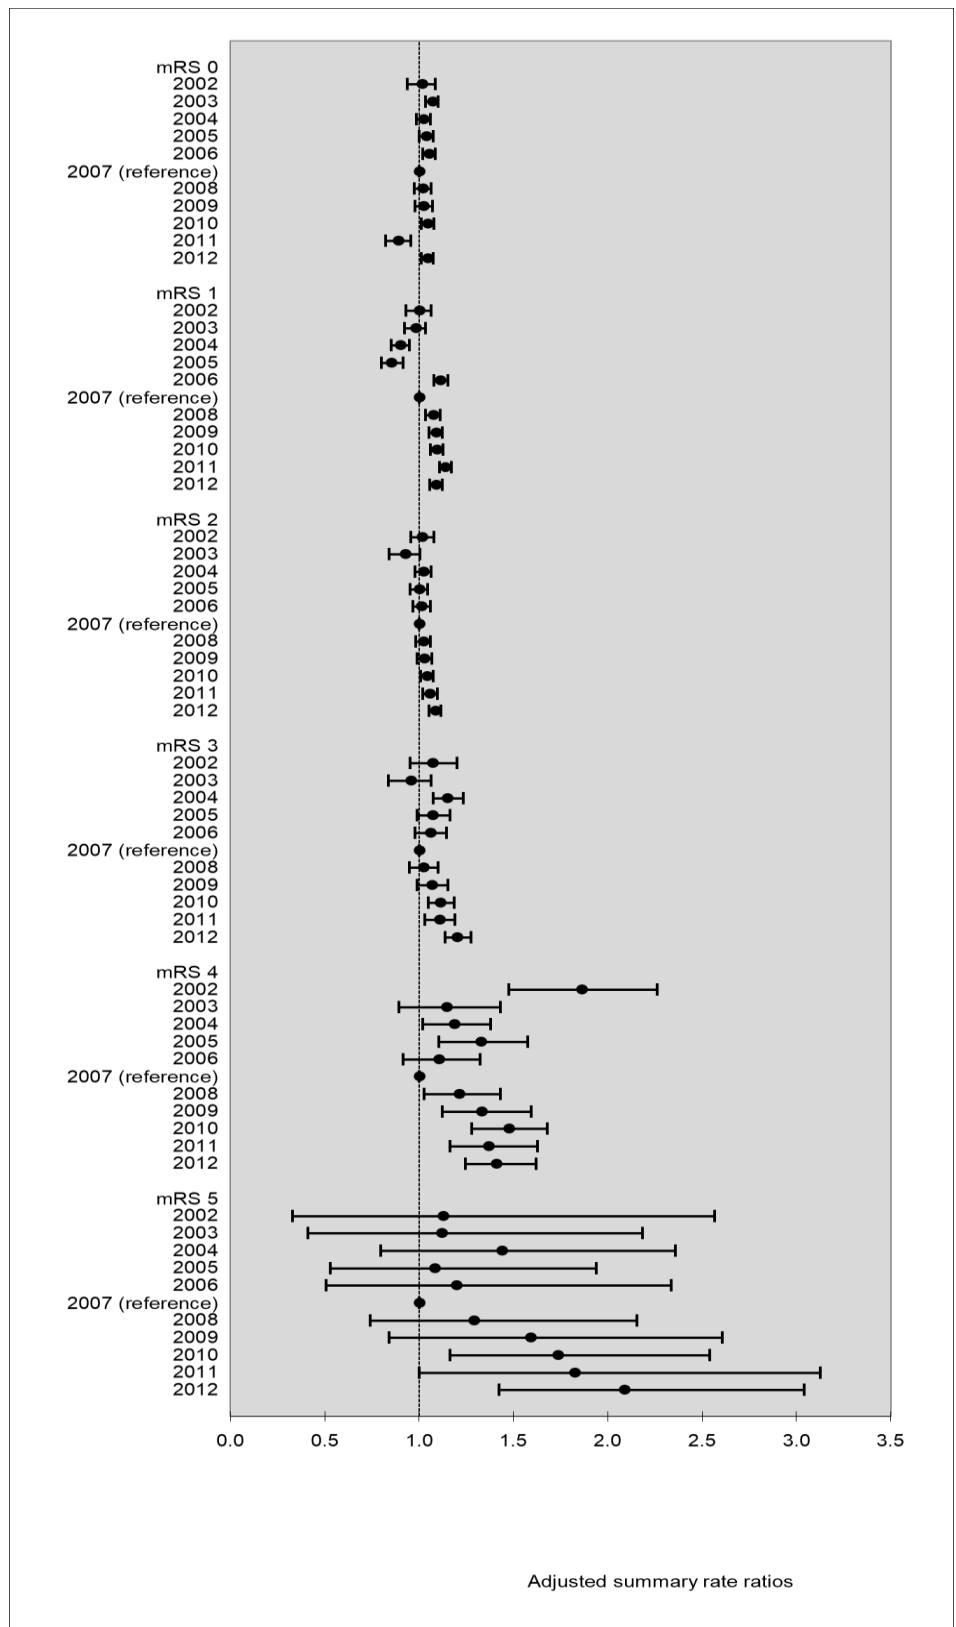

STROBE Statement—Checklist of items that should be included in reports of *cohort studies*

|                              | Item No | Recommendation                                                                                                                                                                                                                                                                                                                                                                                                |               |
|------------------------------|---------|---------------------------------------------------------------------------------------------------------------------------------------------------------------------------------------------------------------------------------------------------------------------------------------------------------------------------------------------------------------------------------------------------------------|---------------|
| <b>Title and abstract</b>    | 1       | (a) Indicate the study's design with a commonly used term in the title or the abstract<br>(b) Provide in the abstract an informative and balanced summary of what was done and what was found                                                                                                                                                                                                                 | p. 1<br>p. 2  |
| <b>Introduction</b>          |         |                                                                                                                                                                                                                                                                                                                                                                                                               |               |
| Background/rationale         | 2       | Explain the scientific background and rationale for the investigation being reported                                                                                                                                                                                                                                                                                                                          | p. 4          |
| Objectives                   | 3       | State specific objectives, including any prespecified hypotheses                                                                                                                                                                                                                                                                                                                                              | p. 5          |
| <b>Methods</b>               |         |                                                                                                                                                                                                                                                                                                                                                                                                               |               |
| Study design                 | 4       | Present key elements of study design early in the paper                                                                                                                                                                                                                                                                                                                                                       | p. 5          |
| Setting                      | 5       | Describe the setting, locations, and relevant dates, including periods of recruitment, exposure, follow-up, and data collection                                                                                                                                                                                                                                                                               | p. 5–6        |
| Participants                 | 6       | (a) Give the eligibility criteria, and the sources and methods of selection of participants. Describe methods of follow-up<br>(b) For matched studies, give matching criteria and number of exposed and unexposed                                                                                                                                                                                             | p. 6–7<br>N/A |
| Variables                    | 7       | Clearly define all outcomes, exposures, predictors, potential confounders, and effect modifiers. Give diagnostic criteria, if applicable                                                                                                                                                                                                                                                                      | p. 6–7        |
| Data sources/<br>measurement | 8*      | For each variable of interest, give sources of data and details of methods of assessment (measurement). Describe comparability of assessment methods if there is more than one group                                                                                                                                                                                                                          | p. 6–7        |
| Bias                         | 9       | Describe any efforts to address potential sources of bias                                                                                                                                                                                                                                                                                                                                                     | p. 6–7        |
| Study size                   | 10      | Explain how the study size was arrived at                                                                                                                                                                                                                                                                                                                                                                     |               |
| Quantitative variables       | 11      | Explain how quantitative variables were handled in the analyses. If applicable, describe which groupings were chosen and why                                                                                                                                                                                                                                                                                  | p. 7–8        |
| Statistical methods          | 12      | (a) Describe all statistical methods, including those used to control for confounding<br>(b) Describe any methods used to examine subgroups and interactions<br>(c) Explain how missing data were addressed<br>(d) If applicable, explain how loss to follow-up was addressed<br>(e) Describe any sensitivity analyses                                                                                        | p. 7–8        |
| <b>Results</b>               |         |                                                                                                                                                                                                                                                                                                                                                                                                               |               |
| Participants                 | 13*     | (a) Report numbers of individuals at each stage of study—eg numbers potentially eligible, examined for eligibility, confirmed eligible, included in the study, completing follow-up, and analysed<br>(b) Give reasons for non-participation at each stage<br>(c) Consider use of a flow diagram                                                                                                               | p. 8–9        |
| Descriptive data             | 14*     | (a) Give characteristics of study participants (eg demographic, clinical, social) and information on exposures and potential confounders<br>(b) Indicate number of participants with missing data for each variable of interest<br>(c) Summarise follow-up time (eg, average and total amount)                                                                                                                | p. 8–9        |
| Outcome data                 | 15*     | Report numbers of outcome events or summary measures over time                                                                                                                                                                                                                                                                                                                                                | p. 9          |
| Main results                 | 16      | (a) Give unadjusted estimates and, if applicable, confounder-adjusted estimates and their precision (eg, 95% confidence interval). Make clear which confounders were adjusted for and why they were included<br>(b) Report category boundaries when continuous variables were categorized<br>(c) If relevant, consider translating estimates of relative risk into absolute risk for a meaningful time period | p. 9–10       |

|    |                          |    |                                                                                                                                                                            |          |
|----|--------------------------|----|----------------------------------------------------------------------------------------------------------------------------------------------------------------------------|----------|
| 1  | Other analyses           | 17 | Report other analyses done—eg analyses of subgroups and interactions, and sensitivity analyses                                                                             | p. 10    |
| 2  |                          |    |                                                                                                                                                                            |          |
| 3  |                          |    |                                                                                                                                                                            |          |
| 4  | <b>Discussion</b>        |    |                                                                                                                                                                            |          |
| 5  | Key results              | 18 | Summarise key results with reference to study objectives                                                                                                                   | p. 10–11 |
| 6  | Limitations              | 19 | Discuss limitations of the study, taking into account sources of potential bias or imprecision. Discuss both direction and magnitude of any potential bias                 | p. 12    |
| 7  |                          |    |                                                                                                                                                                            |          |
| 8  | Interpretation           | 20 | Give a cautious overall interpretation of results considering objectives, limitations, multiplicity of analyses, results from similar studies, and other relevant evidence | p. 12    |
| 9  |                          |    |                                                                                                                                                                            |          |
| 10 | Generalisability         | 21 | Discuss the generalisability (external validity) of the study results                                                                                                      | p. 12–13 |
| 11 |                          |    |                                                                                                                                                                            |          |
| 12 | <b>Other information</b> |    |                                                                                                                                                                            |          |
| 13 | Funding                  | 22 | Give the source of funding and the role of the funders for the present study and, if applicable, for the original study on which the present article is based              | p. 15    |
| 14 |                          |    |                                                                                                                                                                            |          |
| 15 |                          |    |                                                                                                                                                                            |          |
| 16 |                          |    |                                                                                                                                                                            |          |

\*Give information separately for exposed and unexposed groups.

**Note:** An Explanation and Elaboration article discusses each checklist item and gives methodological background and published examples of transparent reporting. The STROBE checklist is best used in conjunction with this article (freely available on the Web sites of PLoS Medicine at <http://www.plosmedicine.org/>, Annals of Internal Medicine at <http://www.annals.org/>, and Epidemiology at <http://www.epidem.com/>). Information on the STROBE Initiative is available at <http://www.strobe-statement.org>.
