# Supplementary material for: Hospital-based cohort study to determine the association between home-time and disability after stroke by age, sex, stroke type and study year in Canada
Source: PubMed Central journal article supplement — BMJ Open. 2019 Nov 11;9(11):e031379. doi: 10.1136/bmjopen-2019-031379 (PMC6858198; doi:10.1136/bmjopen-2019-031379), 2019-11-11

Supplemental Table 1 Administrative data sources

| <b>Database</b>       | <b>Full database name</b>                       | <b>Description</b>                 |
|-----------------------|-------------------------------------------------|------------------------------------|
| DAD                   | Discharge Abstract Database                     | Inpatient hospitalization data     |
| NACRS                 | National Ambulatory Care Reporting System       | Emergency department data          |
| NRS                   | National Rehabilitation Reporting System        | Rehabilitation data                |
| CCRS                  | Continuing Care Reporting System                | Complex continuing care            |
| CCRS-LTC <sup>a</sup> | Continuing Care Reporting System Long-Term Care | Long-term care data                |
| HCD                   | Ontario home care database                      | Home-care data                     |
| OHIP                  | Ontario Health Insurance Plan                   | Outpatient physician billings data |
| ODBP                  | Ontario Drug Benefit Program                    | Pharmacy data                      |
| RPDB                  | Ontario Registered Persons Database             | Mortality data                     |
| OSR                   | Ontario Stroke Registry                         | Disease-specific registry          |

<sup>a</sup>CCRS-LTC was incomplete prior to the 2009/2010 fiscal year. To identify patients admitted to long-term care prior to 2009/2010, we used a validated algorithm with 2 ODB records or 2 OHIP records or 1 ODB and 1 OHIP record within 30 days of each other with a long-term code flag. The date of admission to long-term care was defined as the date of the first record.

Supplemental Figure 1 Study year-specific adjusted summary rate ratio for 90-day home-time by mRS with year 2007 as the reference group

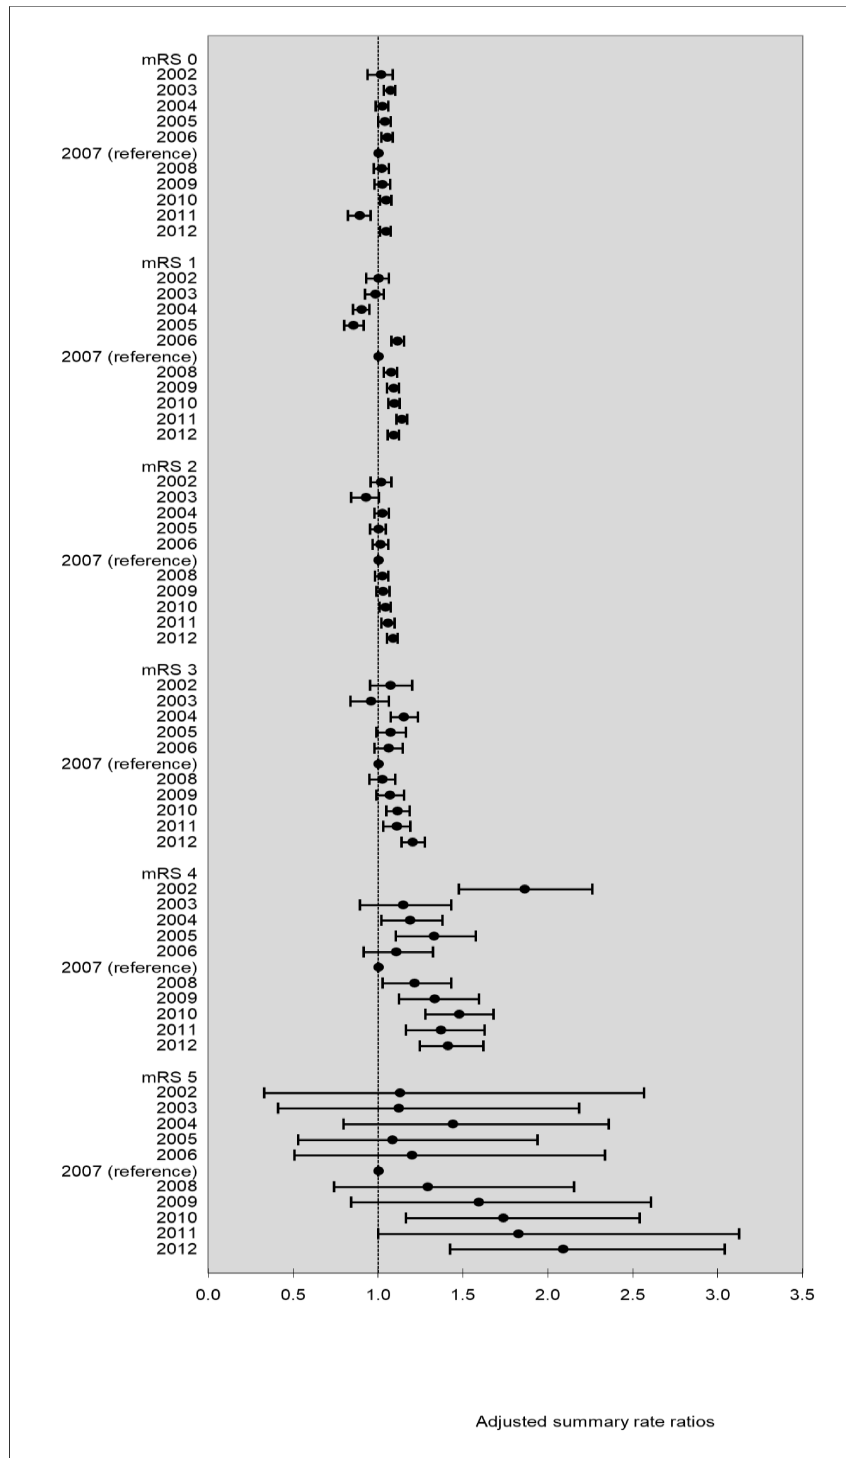

Supplement: bmjopen-2019-031379supp001.pdf [file bmjopen-2019-031379supp001.pdf]
